# Supplementary material for: Epitranscriptomic regulation of the response to the air pollutant naphthalene in mouse lungs: from the perspectives of specialized translation and tolerance linked to the writer ALKBH8
Source: bioRxiv or medRxiv preprint supplement (doi:10.1101/727909), 2019-08-07
Supplement: Supplementary file [file media-1.pdf]

Supplemental Figure 2.

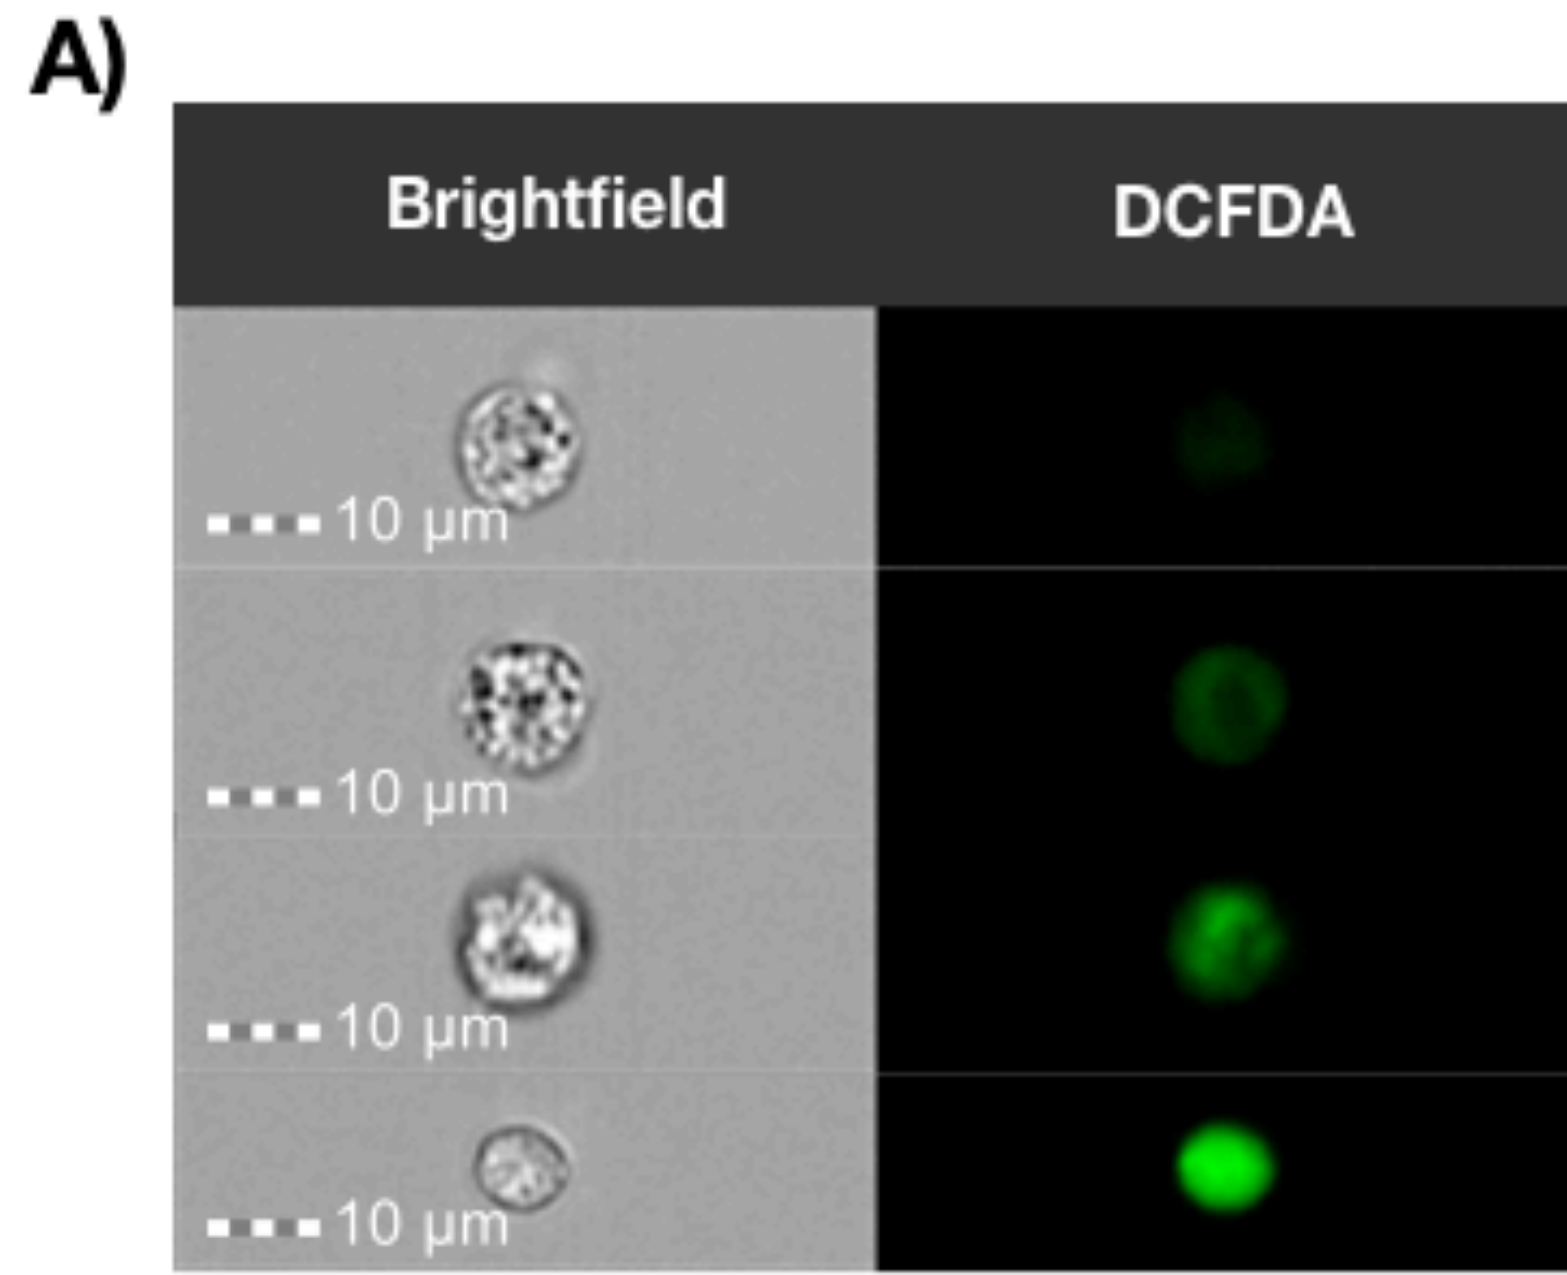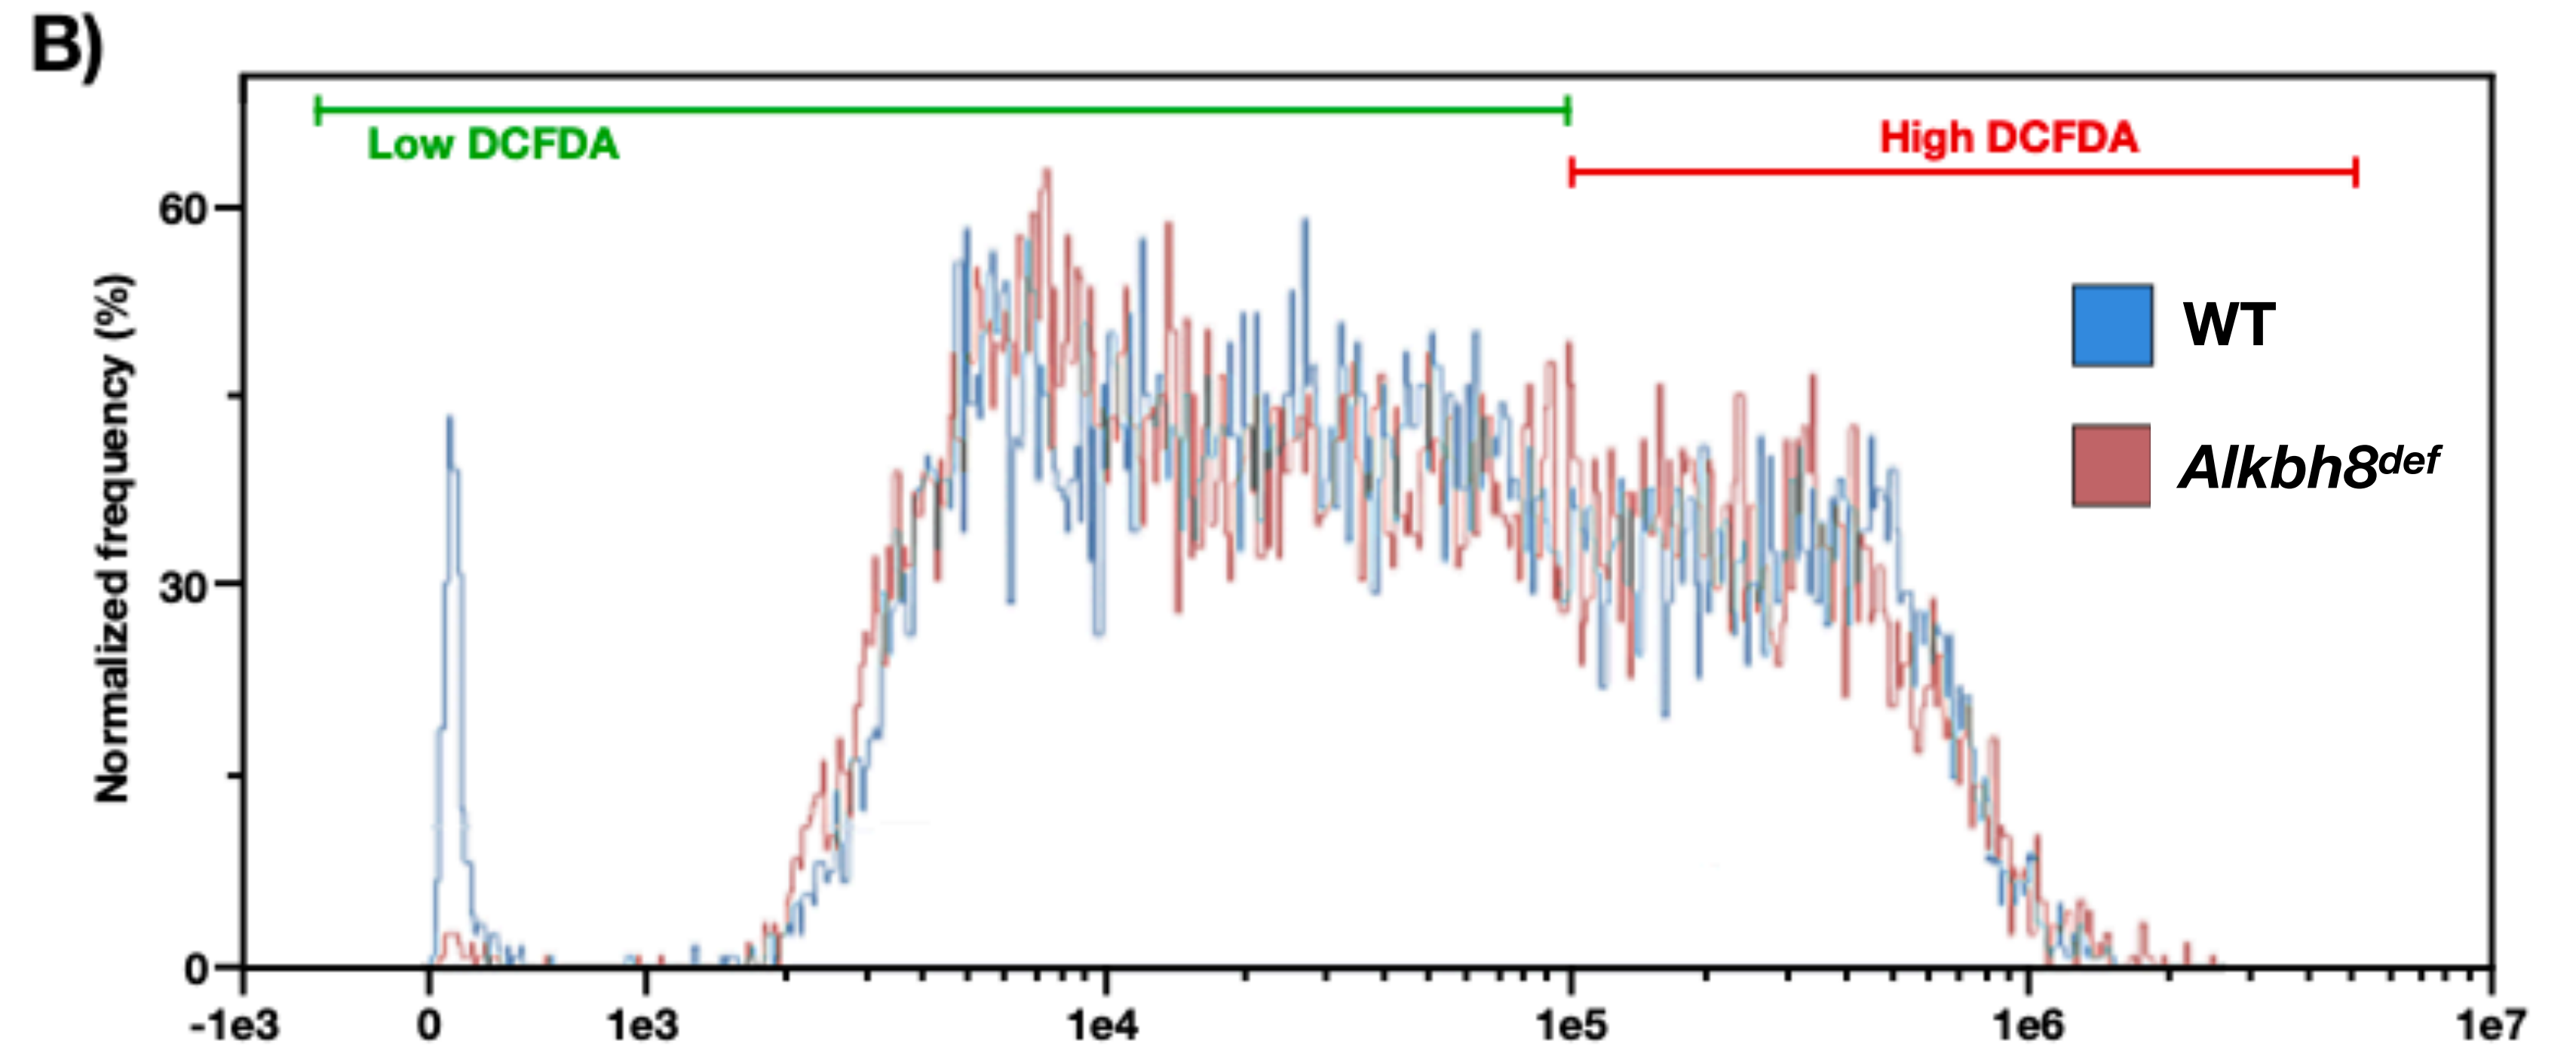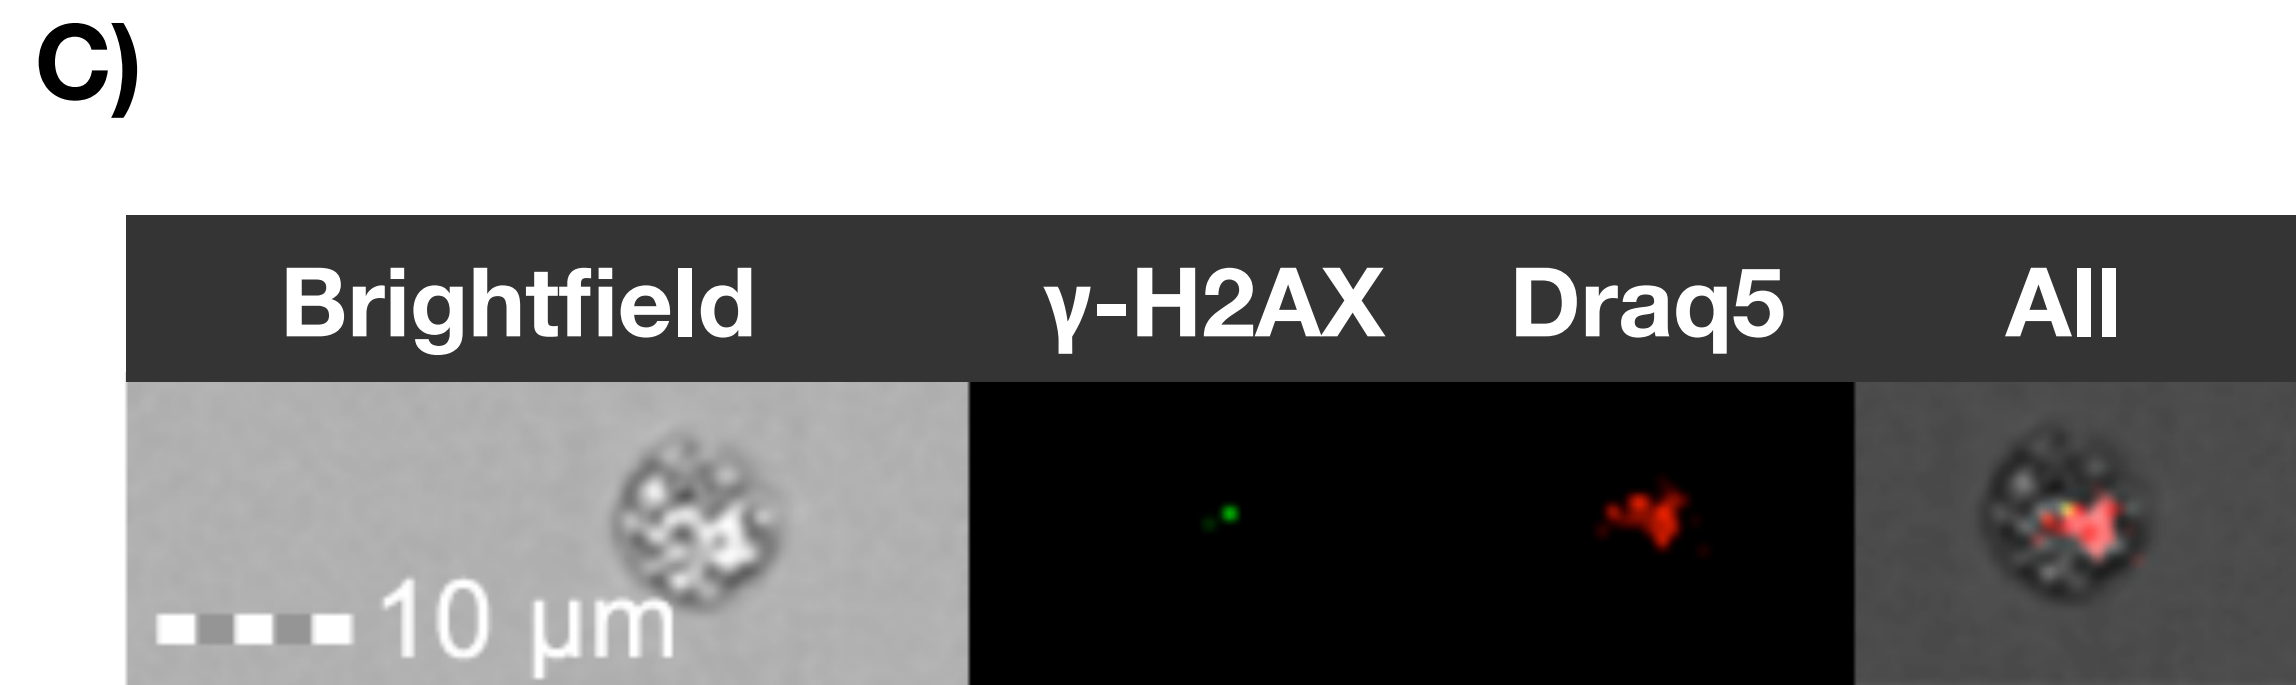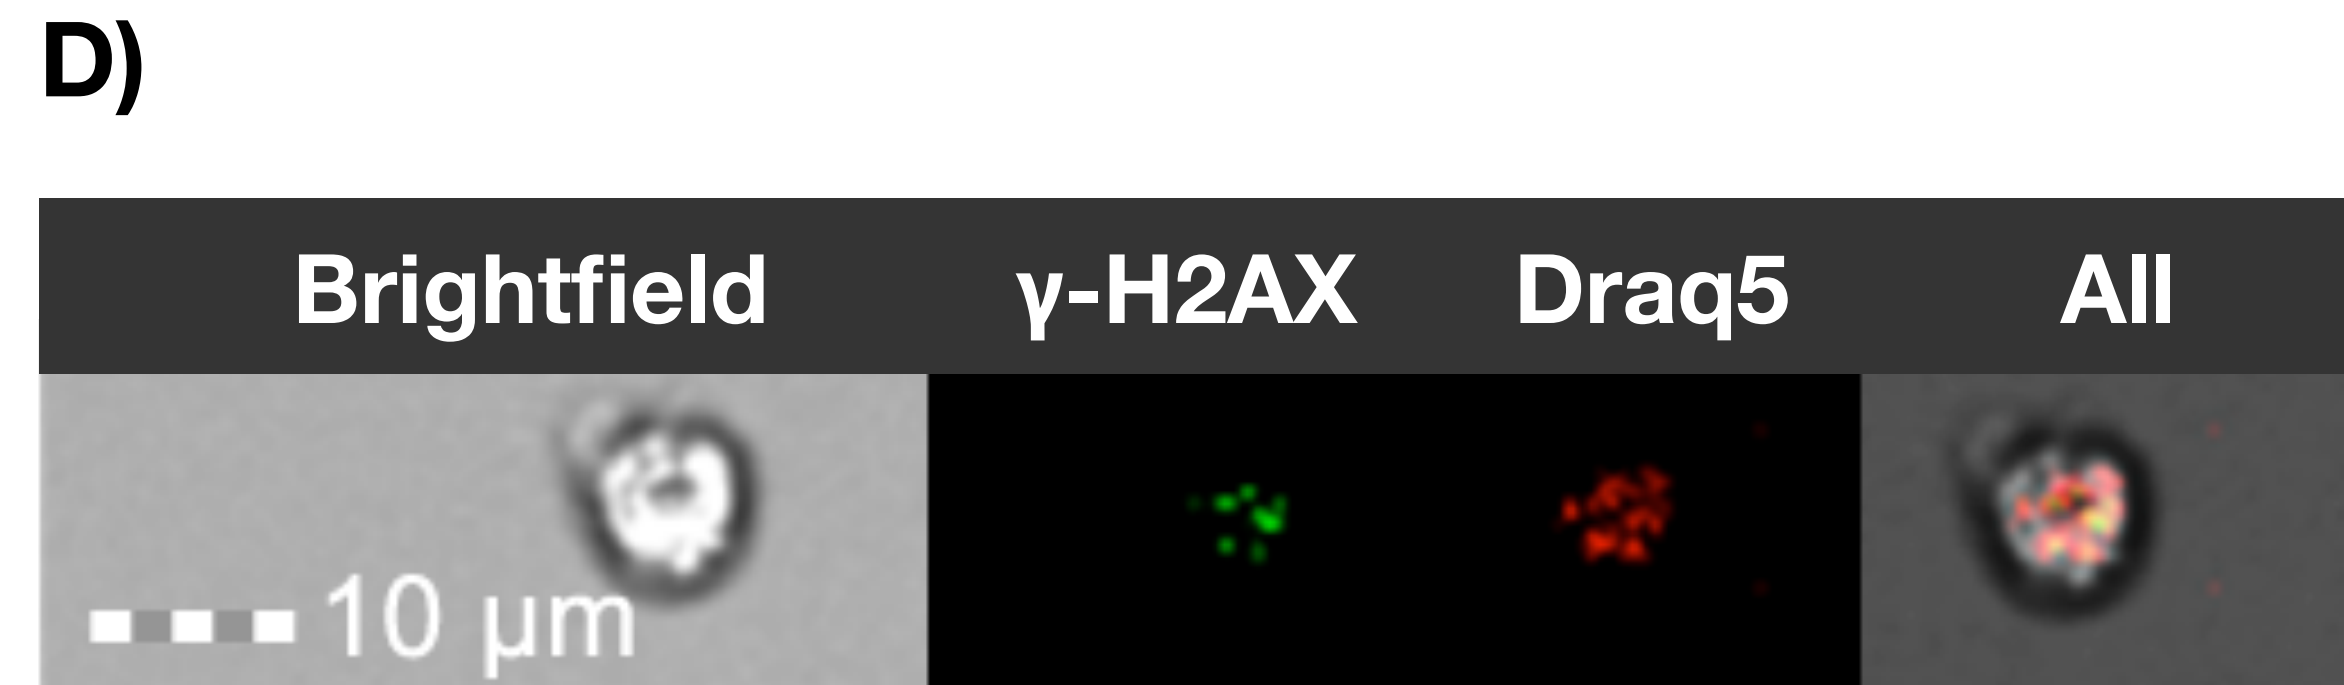

# Supplemental Figure 3.

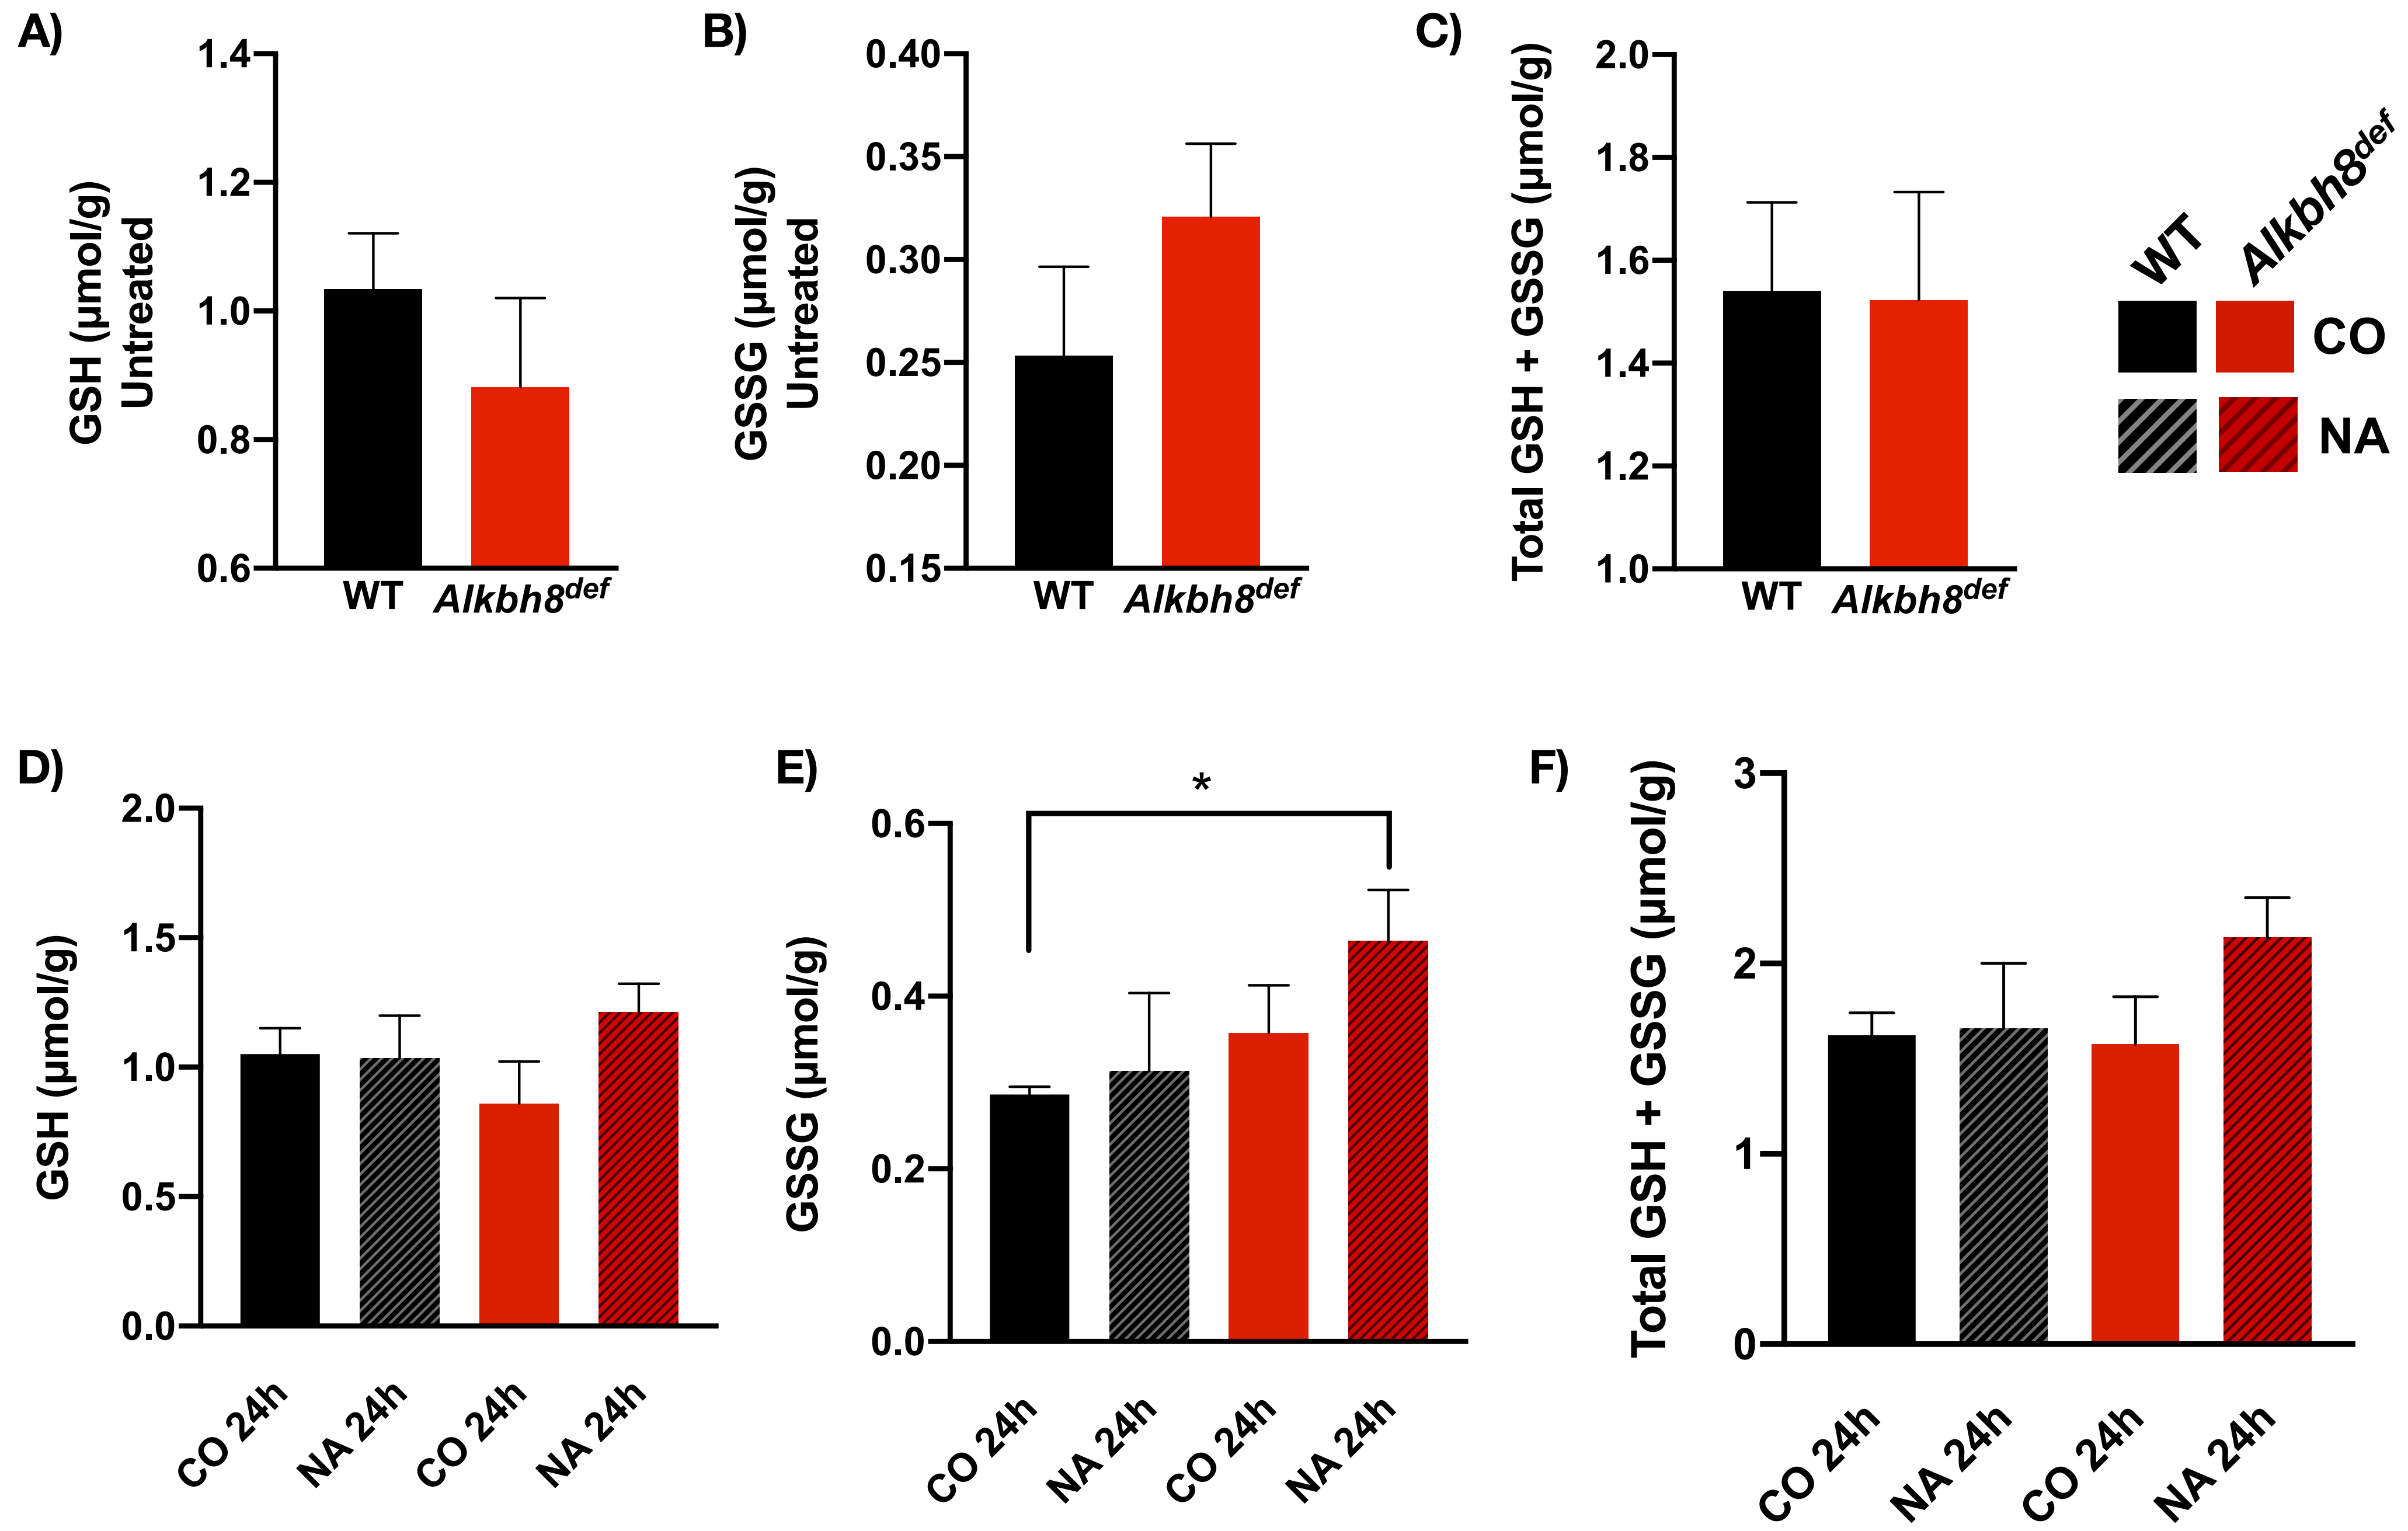

Supplemental Figure 4.

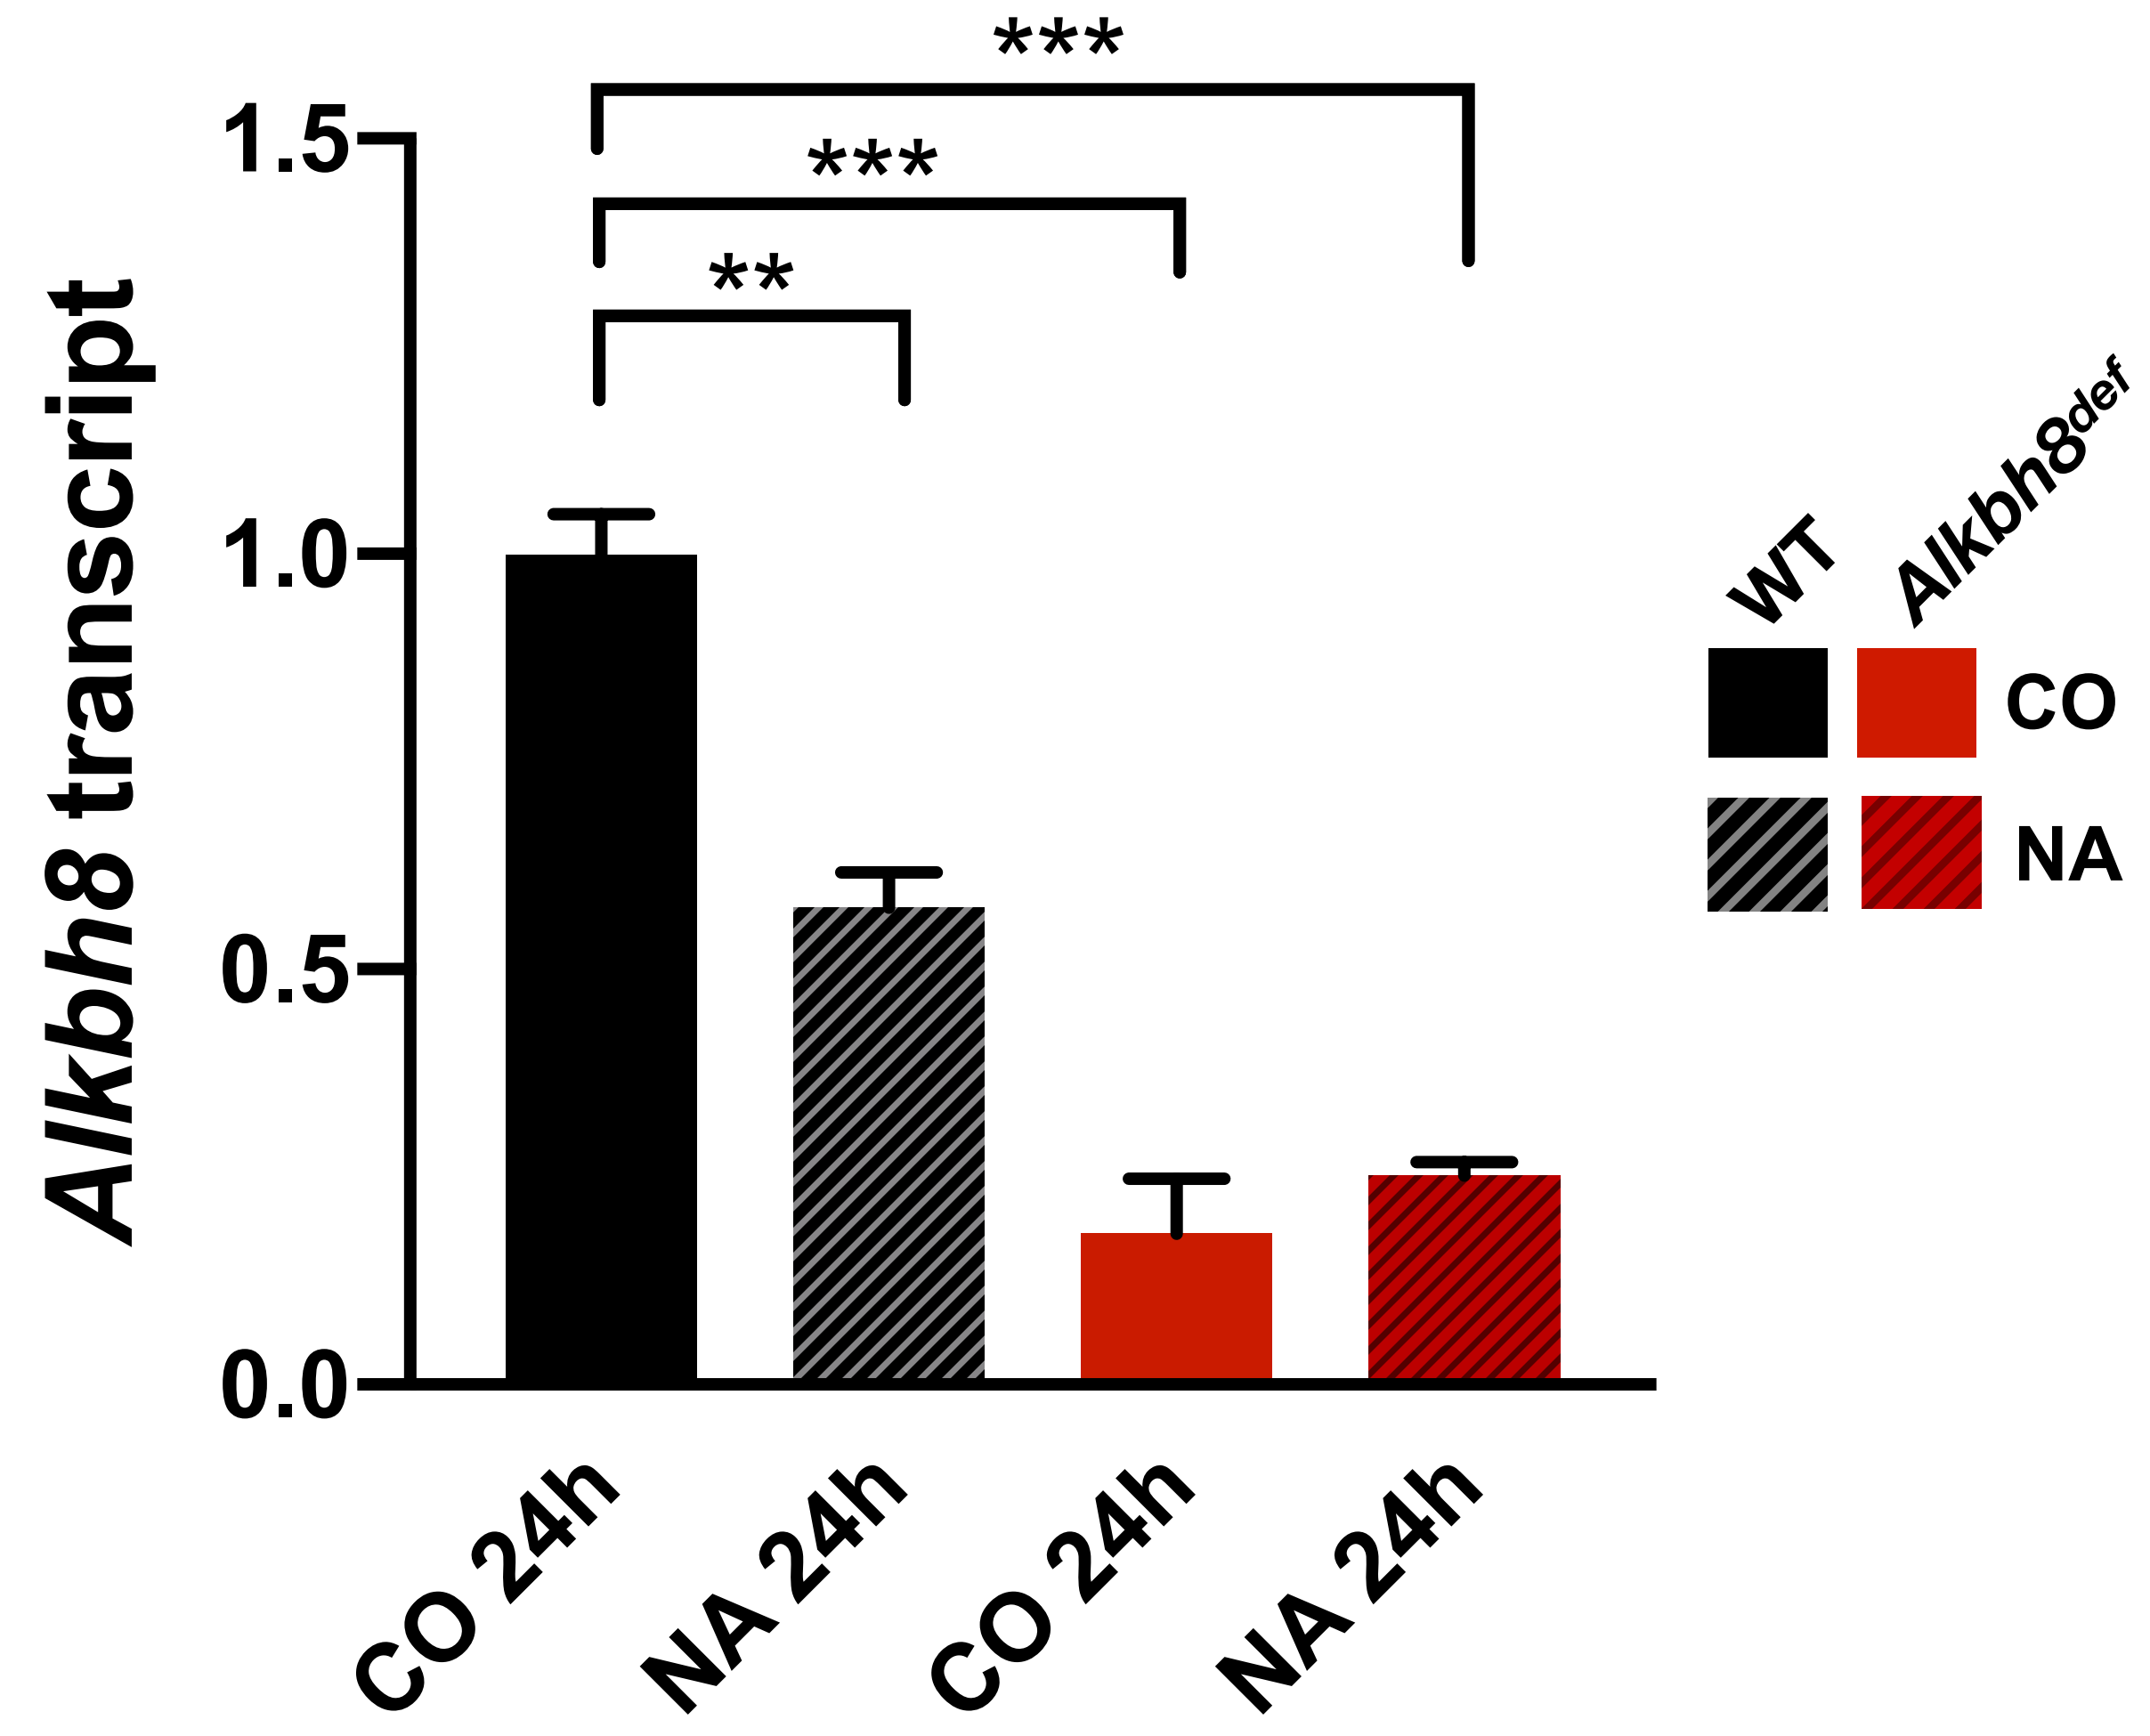

# Supplemental Figure 5.

Untreated

NA/CO Challenged

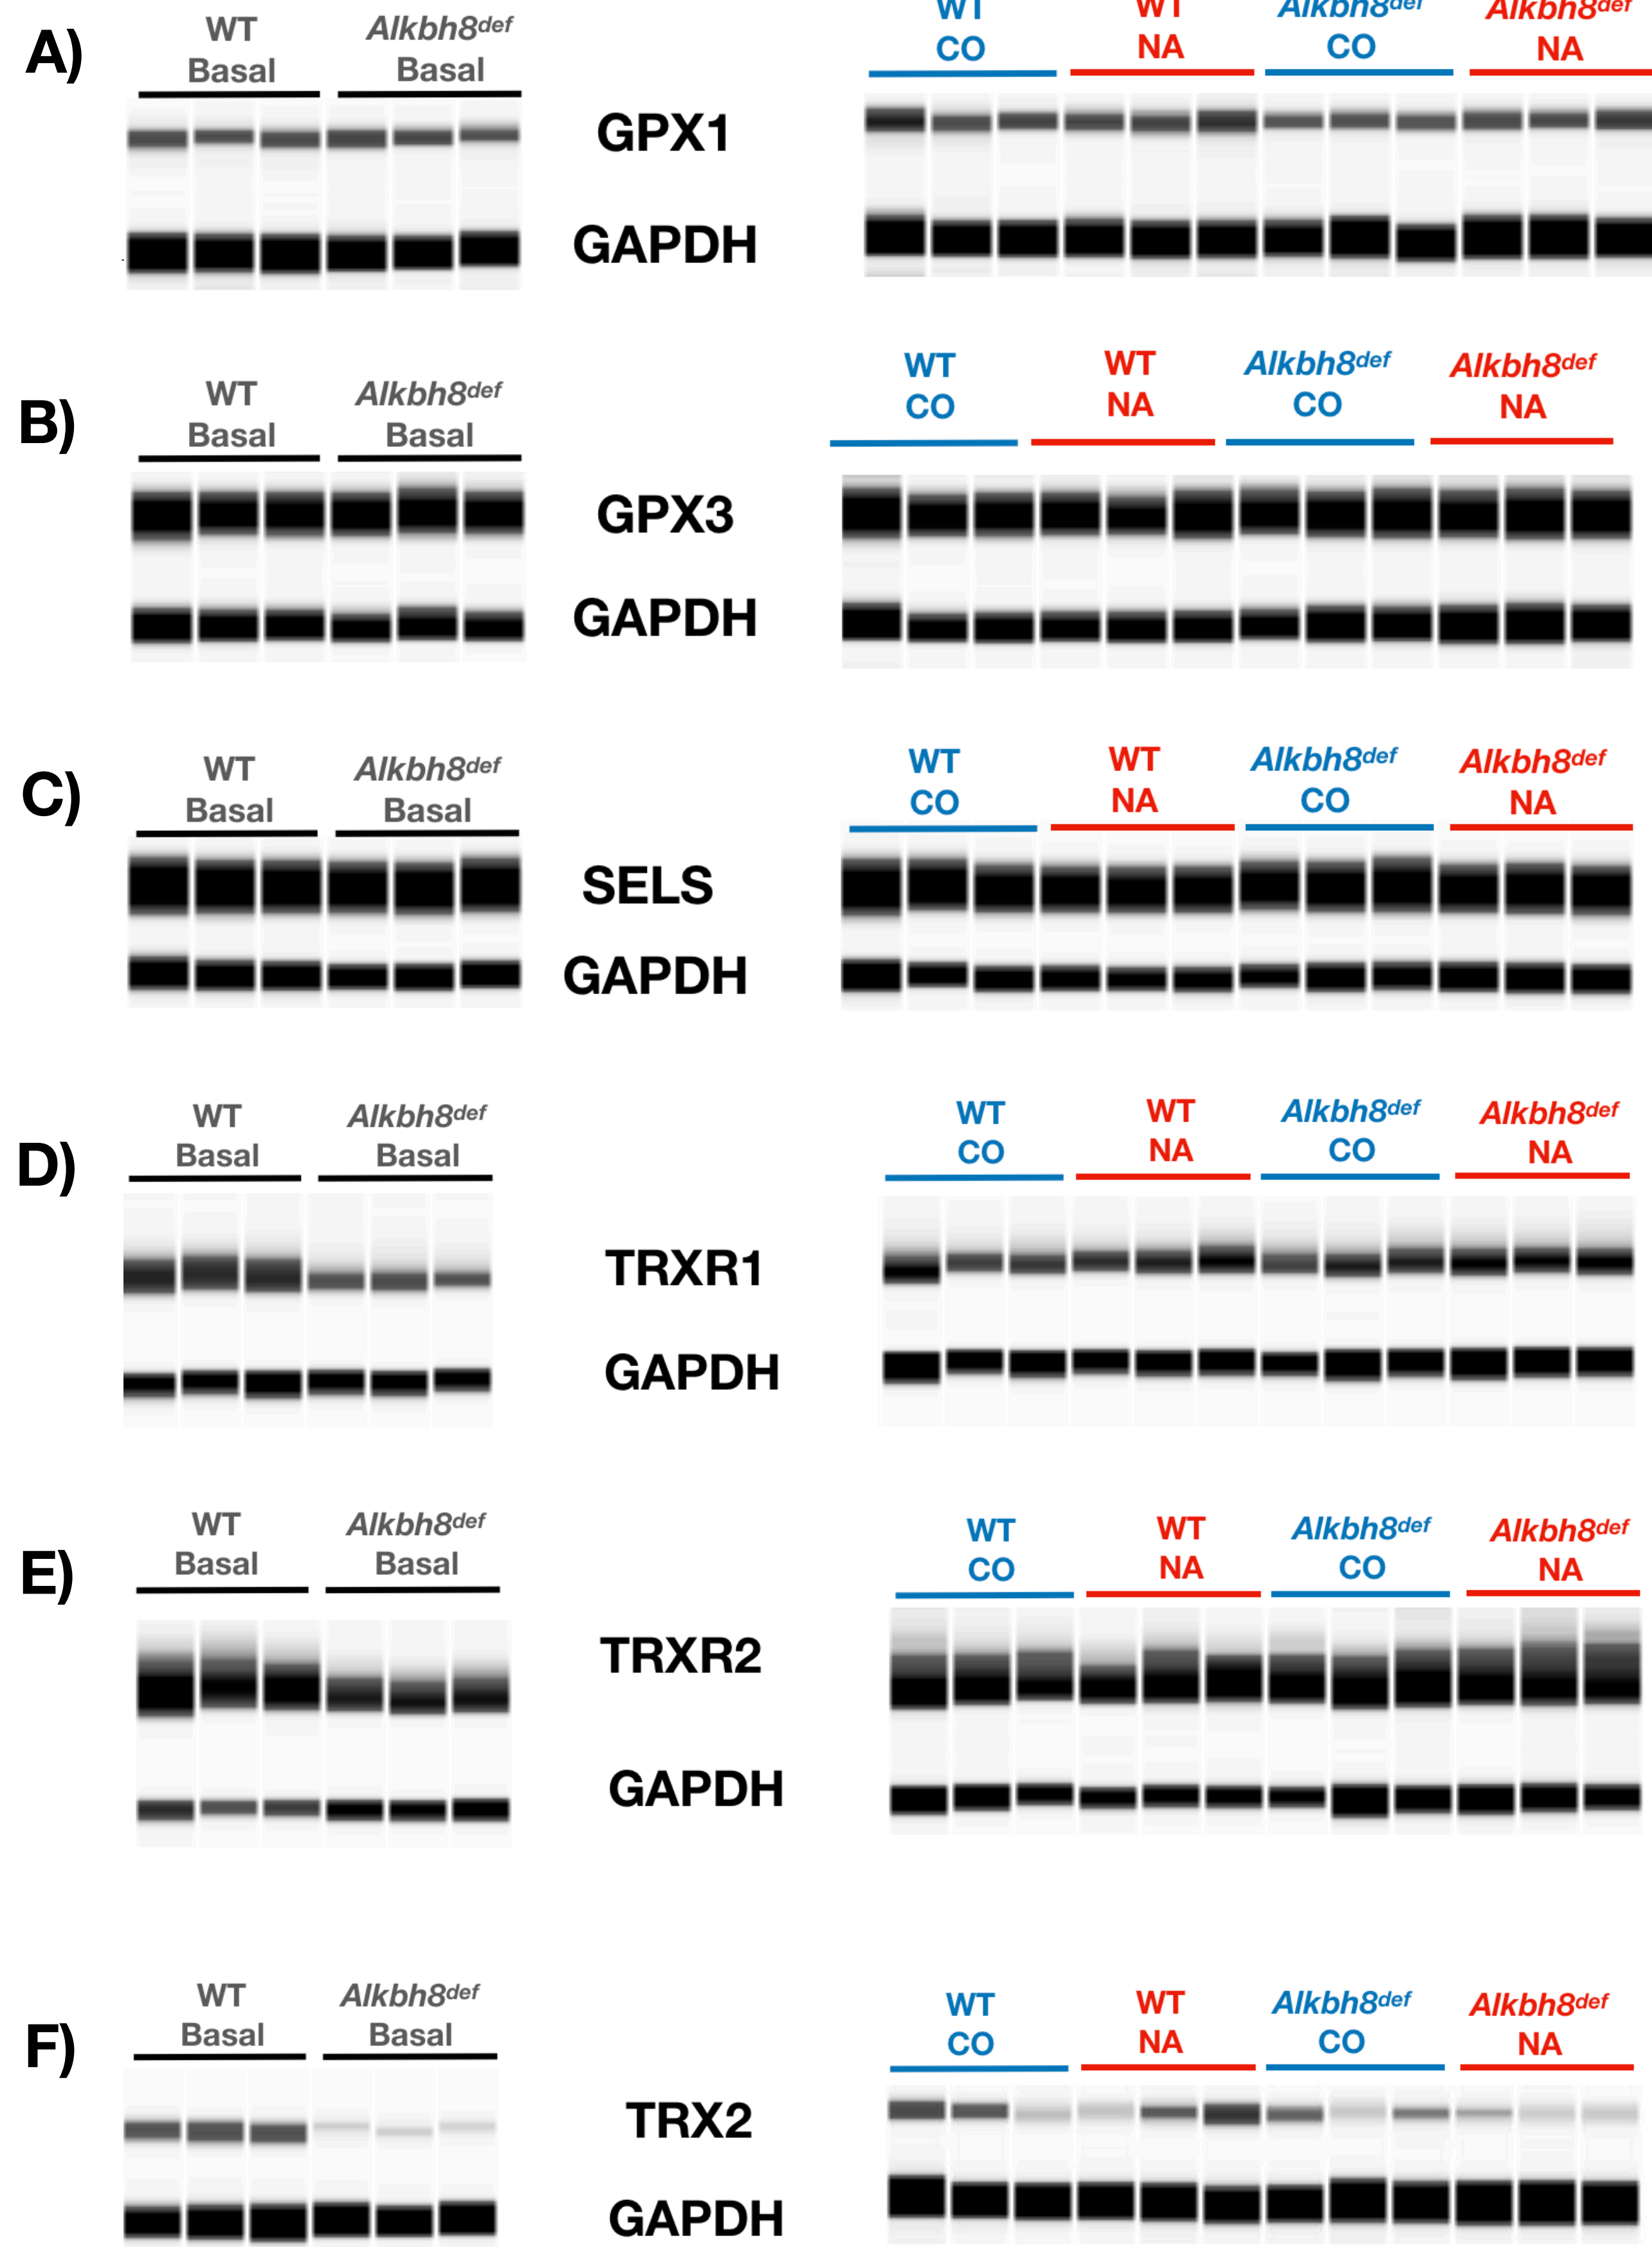

Supplemental Figure 6.

NA 200mg/kg, 3 days

WT

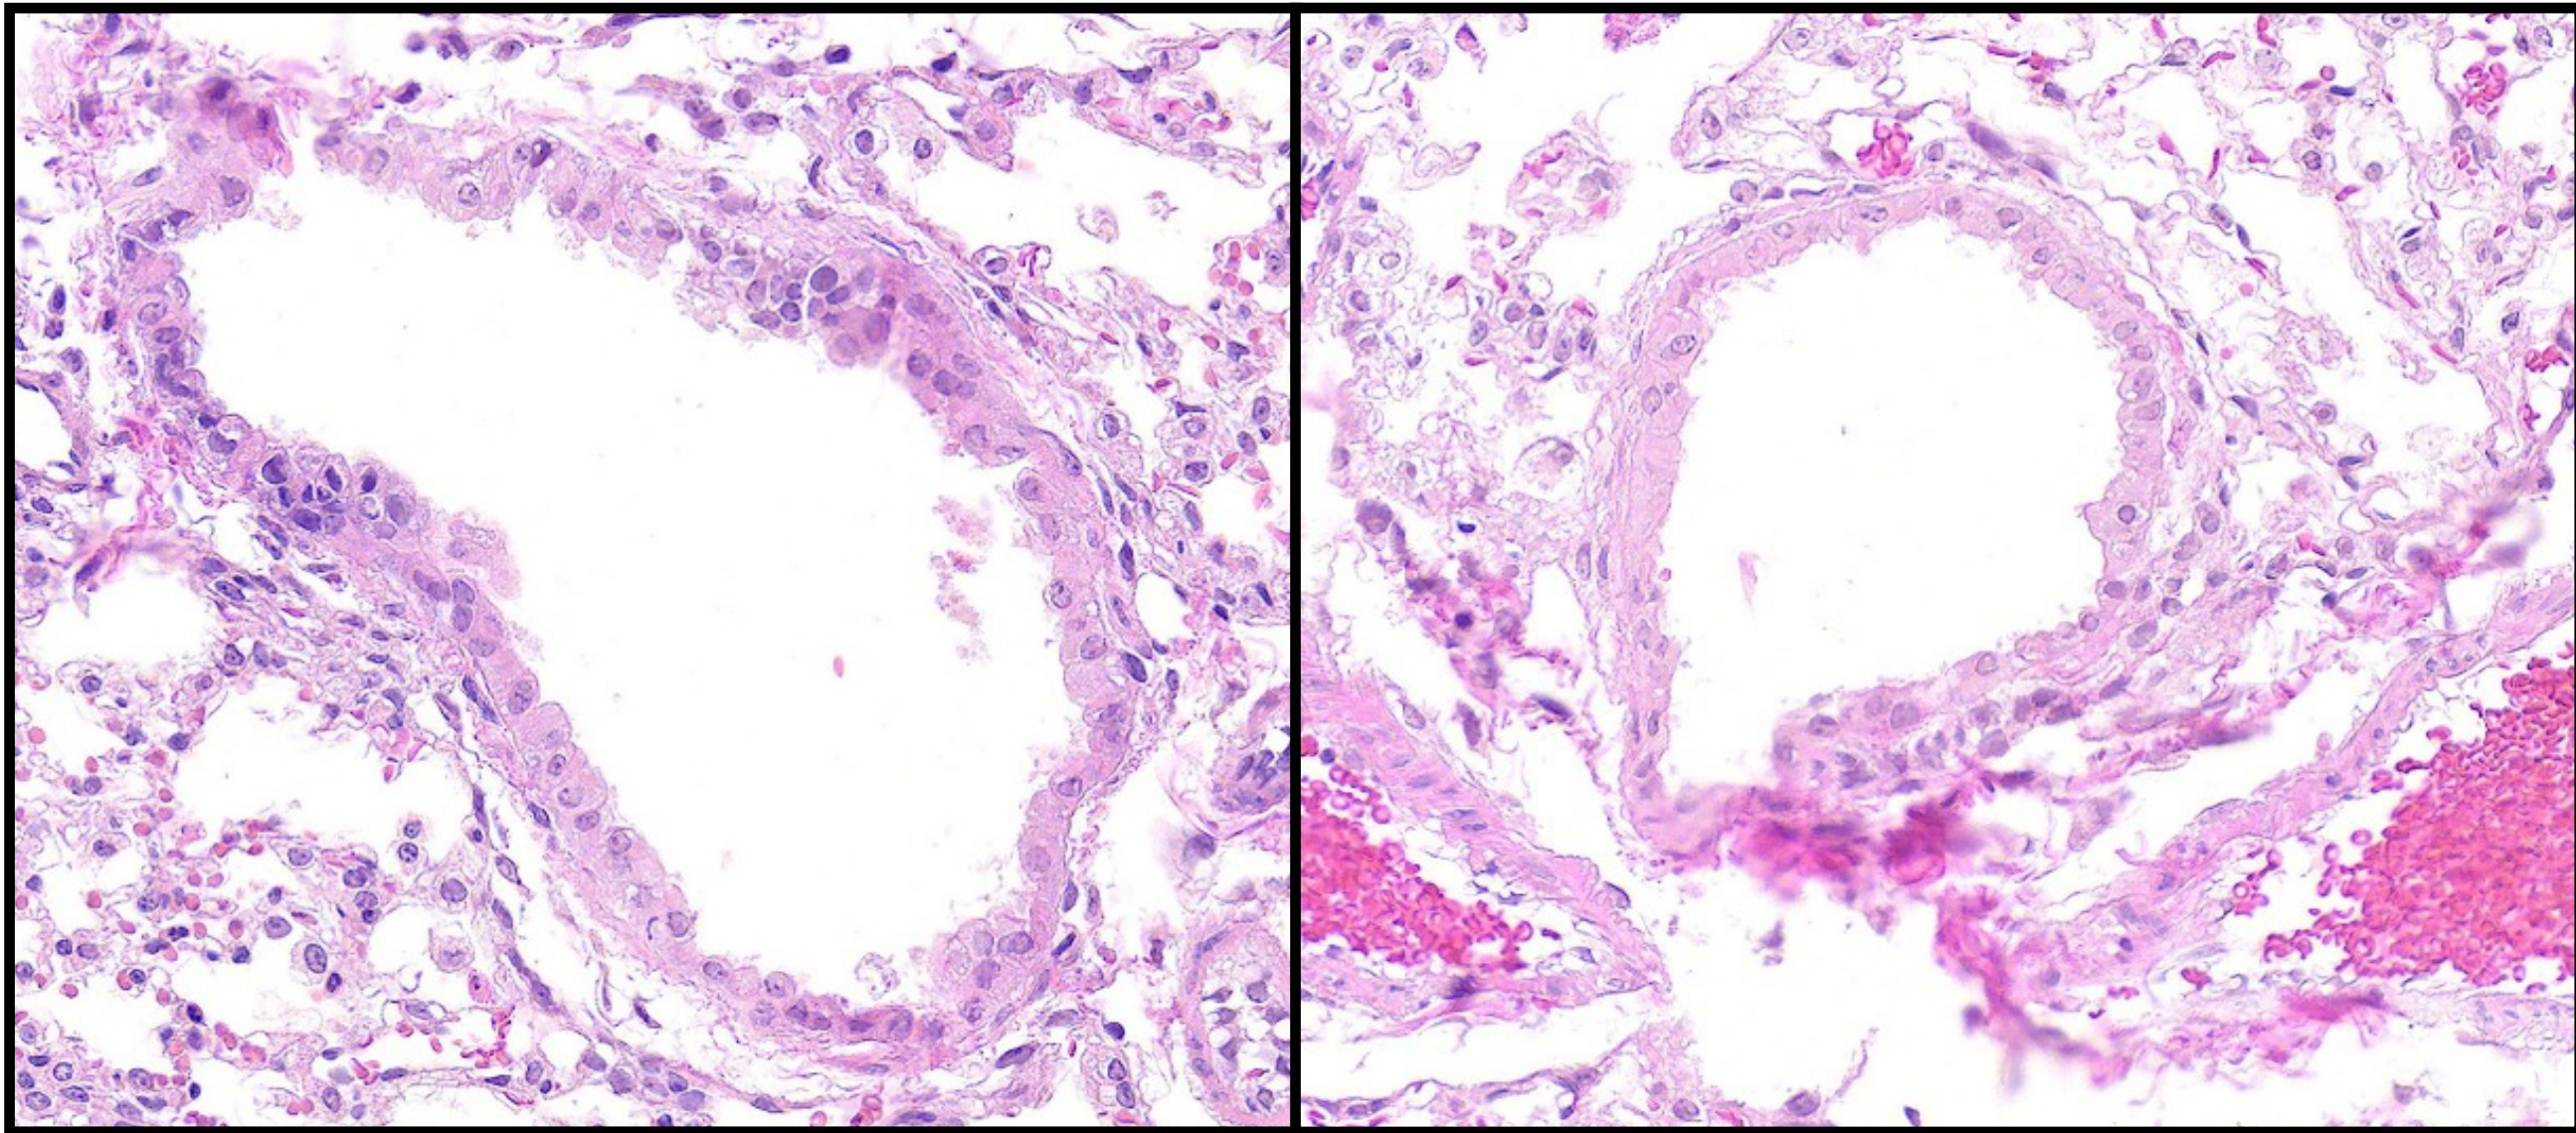

*Alkbh8*<sup>def</sup>

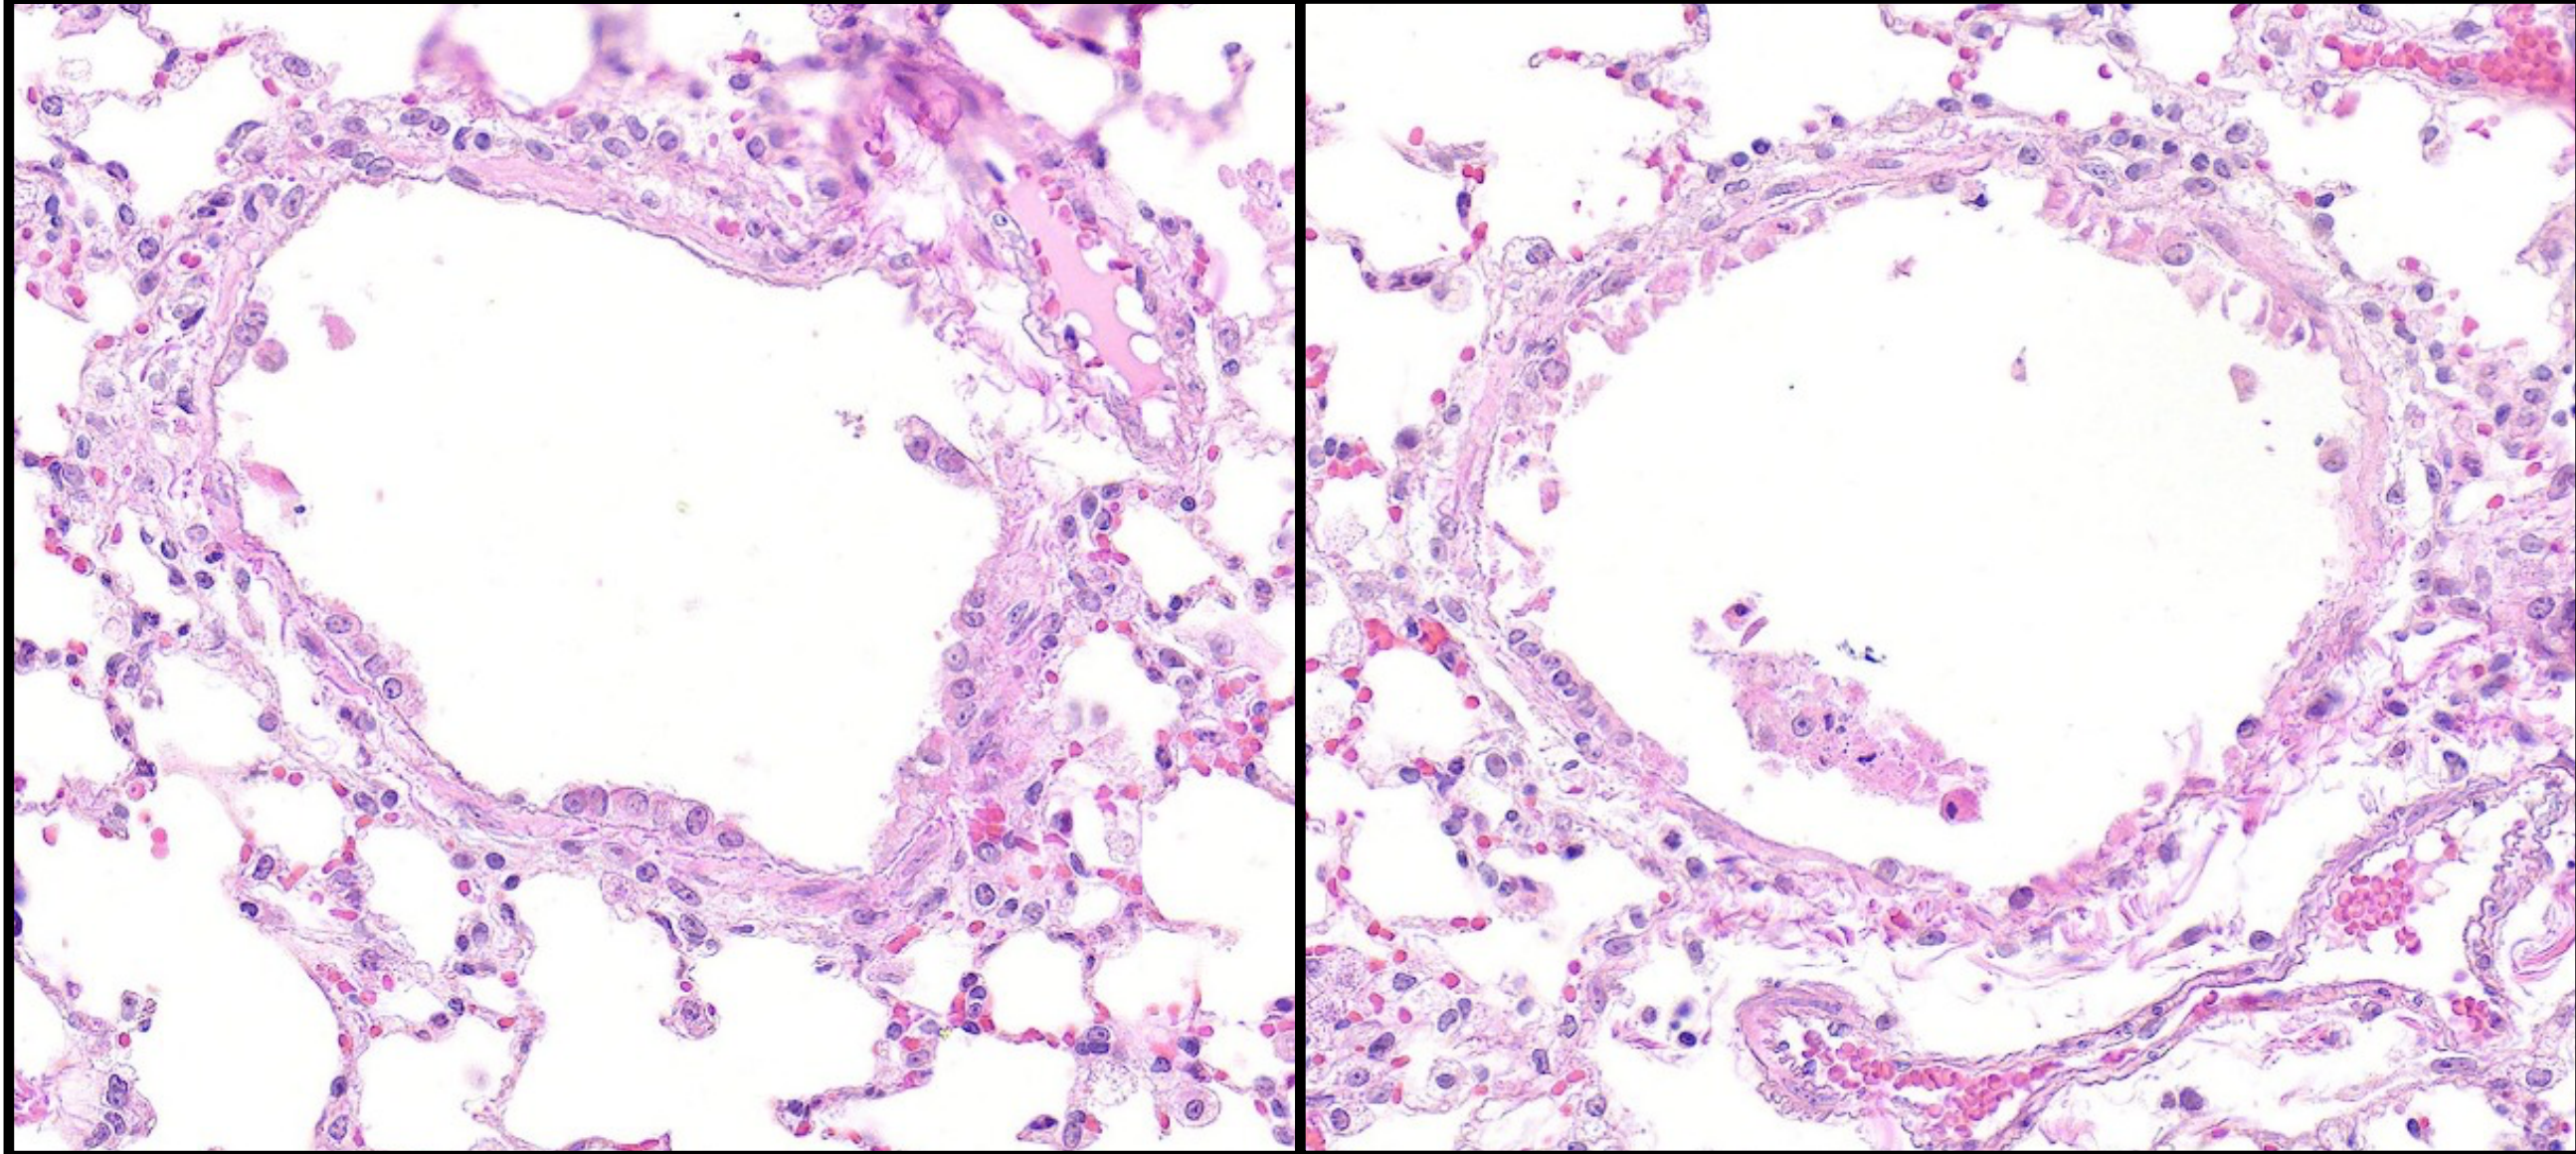

*Cyp2abfgs*-null

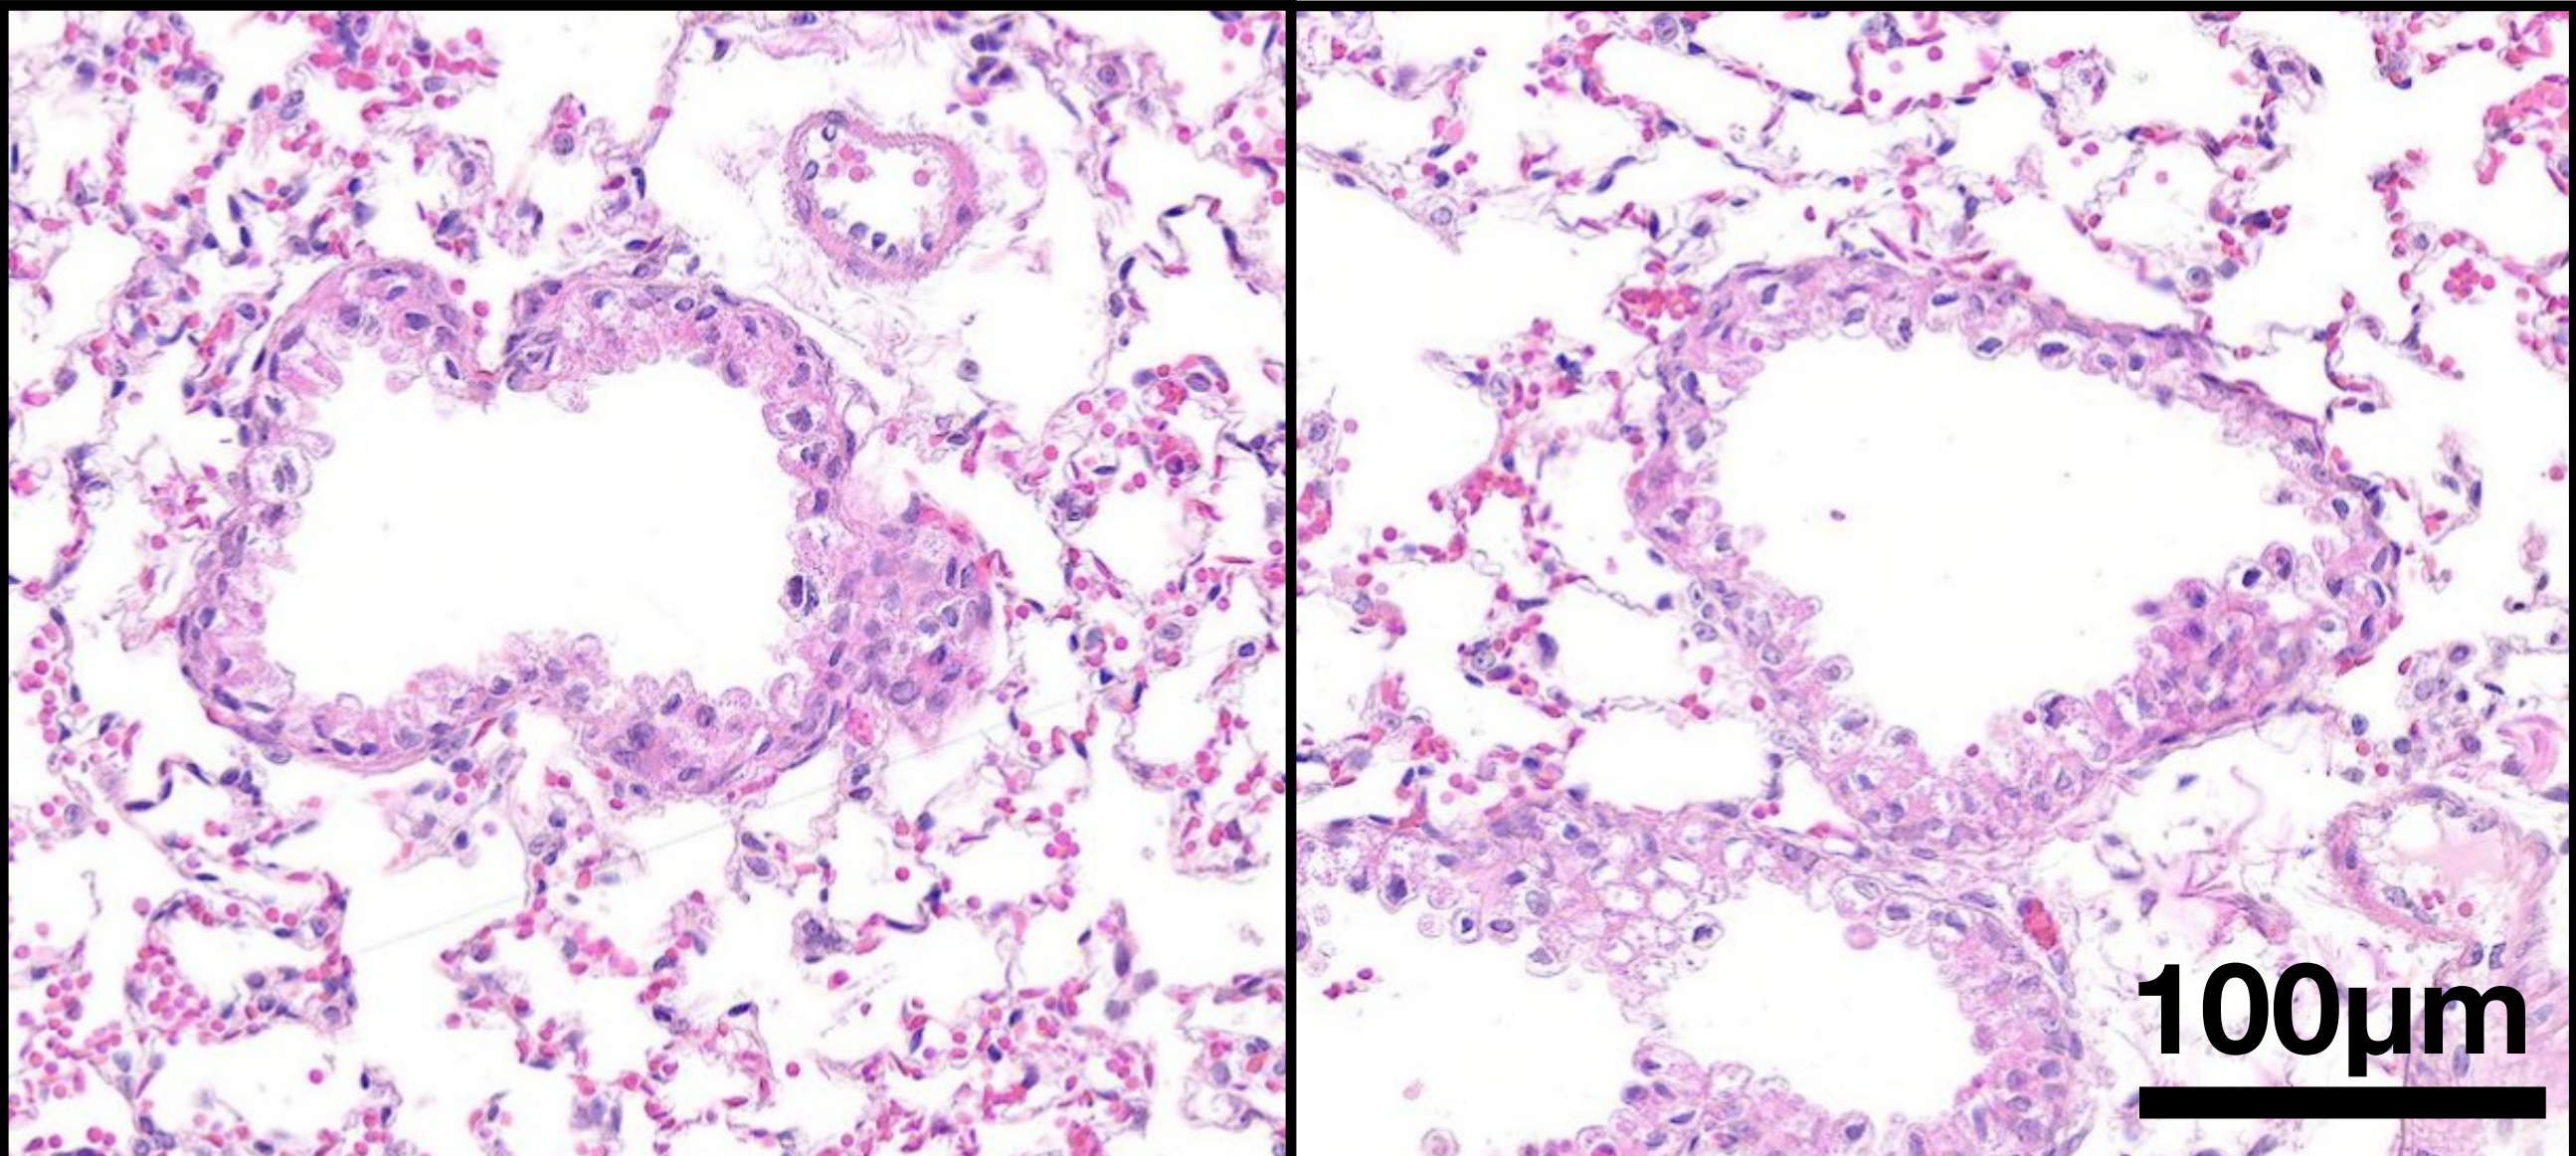

**Supplemental Table 1: Targeted RNAseq Gene Panel**

| <b>Genes on panel:</b> | <b>Ensembl ID:</b> |
|------------------------|--------------------|
| <i>Abl1</i>            | ENSMUSG00000026842 |
| <i>Aimp1</i>           | ENSMUSG00000028029 |
| <i>Alb</i>             | ENSMUSG00000029368 |
| <i>Als2</i>            | ENSMUSG00000026024 |
| <i>Aox1</i>            | ENSMUSG00000063558 |
| <i>Apc</i>             | ENSMUSG00000005871 |
| <i>Apex1</i>           | ENSMUSG00000035960 |
| <i>ApoE</i>            | ENSMUSG00000002985 |
| <i>Atf4</i>            | ENSMUSG00000042406 |
| <i>Atf6</i>            | ENSMUSG00000026663 |
| <i>Atf6b</i>           | ENSMUSG00000015461 |
| <i>Atm</i>             | ENSMUSG00000034218 |
| <i>Atr</i>             | ENSMUSG00000032409 |
| <i>Atrx</i>            | ENSMUSG00000031229 |
| <i>Atxn3</i>           | ENSMUSG00000021189 |
| <i>Bax</i>             | ENSMUSG00000003873 |
| <i>Blm</i>             | ENSMUSG00000030528 |
| <i>Bmp2</i>            | ENSMUSG00000027358 |
| <i>Brca1</i>           | ENSMUSG00000017146 |
| <i>Brca2</i>           | ENSMUSG00000041147 |
| <i>Brip1</i>           | ENSMUSG00000034329 |
| <i>Calr</i>            | ENSMUSG00000003814 |
| <i>Canx</i>            | ENSMUSG00000020368 |
| <i>Casp1</i>           | ENSMUSG00000025888 |
| <i>Cat</i>             | ENSMUSG00000027187 |
| <i>Ccl1</i>            | ENSMUSG00000020702 |
| <i>Ccl11</i>           | ENSMUSG00000020676 |
| <i>Ccl12</i>           | ENSMUSG00000035352 |
| <i>Ccl17</i>           | ENSMUSG00000031780 |
| <i>Ccl19</i>           | ENSMUSG00000071005 |
| <i>Ccl2</i>            | ENSMUSG00000035385 |
| <i>Ccl20</i>           | ENSMUSG00000026166 |
| <i>Ccl22</i>           | ENSMUSG00000031779 |
| <i>Ccl24</i>           | ENSMUSG00000004814 |
| <i>Ccl3</i>            | ENSMUSG00000000982 |
| <i>Ccl4</i>            | ENSMUSG00000018930 |
| <i>Ccl5</i>            | ENSMUSG00000035042 |

|                |                    |
|----------------|--------------------|
| <i>Ccl6</i>    | ENSMUSG00000018927 |
| <i>Ccl7</i>    | ENSMUSG00000035373 |
| <i>Ccl8</i>    | ENSMUSG00000009185 |
| <i>Ccl9</i>    | ENSMUSG00000019122 |
| <i>Ccr1</i>    | ENSMUSG00000025804 |
| <i>Ccr10</i>   | ENSMUSG00000044052 |
| <i>Ccr2</i>    | ENSMUSG00000049103 |
| <i>Ccr3</i>    | ENSMUSG00000035448 |
| <i>Ccr4</i>    | ENSMUSG00000047898 |
| <i>Ccr5</i>    | ENSMUSG00000079227 |
| <i>Ccr6</i>    | ENSMUSG00000040899 |
| <i>Ccr8</i>    | ENSMUSG00000042262 |
| <i>Ccs</i>     | ENSMUSG00000034108 |
| <i>Cct4</i>    | ENSMUSG00000007739 |
| <i>Cct7</i>    | ENSMUSG00000030007 |
| <i>Cd40lg</i>  | ENSMUSG00000031132 |
| <i>Cdc25a</i>  | ENSMUSG00000032477 |
| <i>Cdc25c</i>  | ENSMUSG00000044201 |
| <i>Cdkn1a</i>  | ENSMUSG00000023067 |
| <i>Cebpb</i>   | ENSMUSG00000056501 |
| <i>Chek1</i>   | ENSMUSG00000032113 |
| <i>Chek2</i>   | ENSMUSG00000029521 |
| <i>Chst1</i>   | ENSMUSG00000027221 |
| <i>Creb3</i>   | ENSMUSG00000028466 |
| <i>Creb3l3</i> | ENSMUSG00000035041 |
| <i>Csf1</i>    | ENSMUSG00000014599 |
| <i>Csf2</i>    | ENSMUSG00000018916 |
| <i>Csf3</i>    | ENSMUSG00000038067 |
| <i>Ctsb</i>    | ENSMUSG00000021939 |
| <i>Cx3cl1</i>  | ENSMUSG00000031778 |
| <i>Cxcl1</i>   | ENSMUSG00000029380 |
| <i>Cxcl10</i>  | ENSMUSG00000034855 |
| <i>Cxcl11</i>  | ENSMUSG00000060183 |
| <i>Cxcl12</i>  | ENSMUSG00000061353 |
| <i>Cxcl13</i>  | ENSMUSG00000023078 |
| <i>Cxcl15</i>  | ENSMUSG00000029375 |
| <i>Cxcl5</i>   | ENSMUSG00000029371 |
| <i>Cxcl9</i>   | ENSMUSG00000029417 |
| <i>Cxcr2</i>   | ENSMUSG00000026180 |
| <i>Cxcr3</i>   | ENSMUSG00000050232 |
| <i>Cxcr5</i>   | ENSMUSG00000047880 |



|                |                    |
|----------------|--------------------|
| <i>Cyba</i>    | ENSMUSG00000006519 |
| <i>Cygb</i>    | ENSMUSG00000020810 |
| <i>Cyp2a5</i>  | ENSMUSG00000005547 |
| <i>Cyp2b10</i> | ENSMUSG00000030483 |
| <i>Cyp2e1</i>  | ENSMUSG00000025479 |
| <i>Cyp2f2</i>  | ENSMUSG00000052974 |
| <i>Ddit3</i>   | ENSMUSG00000025408 |
| <i>Derl1</i>   | ENSMUSG00000022365 |
| <i>Derl2</i>   | ENSMUSG00000018442 |
| <i>Dnajb2</i>  | ENSMUSG00000026203 |
| <i>Dnajb9</i>  | ENSMUSG00000014905 |
| <i>Dnajc10</i> | ENSMUSG00000027006 |
| <i>Dnajc3b</i> | ENSMUSG00000022136 |
| <i>Dnajc4</i>  | ENSMUSG00000024963 |
| <i>Dnm2</i>    | ENSMUSG00000033335 |
| <i>Duox1</i>   | ENSMUSG00000033268 |
| <i>Edem1</i>   | ENSMUSG00000030104 |
| <i>Ehd2</i>    | ENSMUSG00000074364 |
| <i>Eif2a</i>   | ENSMUSG00000027810 |
| <i>Eif2ak3</i> | ENSMUSG00000031668 |
| <i>Ephx1</i>   | ENSMUSG00000038776 |
| <i>Ephx2</i>   | ENSMUSG00000022040 |
| <i>Epx</i>     | ENSMUSG00000052234 |
| <i>Ercc1</i>   | ENSMUSG00000003549 |
| <i>Ercc2</i>   | ENSMUSG00000030400 |
| <i>Ercc6</i>   | ENSMUSG00000054051 |
| <i>Ern1</i>    | ENSMUSG00000020715 |
| <i>Ern2</i>    | ENSMUSG00000030866 |
| <i>Ero1l</i>   | ENSMUSG00000021831 |
| <i>Ero1lb</i>  | ENSMUSG00000057069 |
| <i>Erp44</i>   | ENSMUSG00000028343 |
| <i>Exo1</i>    | ENSMUSG00000039748 |
| <i>Fanca</i>   | ENSMUSG00000032815 |
| <i>Fancc</i>   | ENSMUSG00000021461 |
| <i>Fancd2</i>  | ENSMUSG00000034023 |
| <i>Fancg</i>   | ENSMUSG00000028453 |
| <i>Fasl</i>    | ENSMUSG00000000817 |
| <i>Fbxo6</i>   | ENSMUSG00000055401 |
| <i>Fen1</i>    | ENSMUSG00000024742 |
| <i>Fmo2</i>    | ENSMUSG00000040170 |
| <i>Fth1</i>    | ENSMUSG00000024661 |

|                |                    |
|----------------|--------------------|
| <i>Gadd45a</i> | ENSMUSG00000036390 |
| <i>Gadd45g</i> | ENSMUSG00000021453 |
| <i>Ganab</i>   | ENSMUSG00000071650 |
| <i>Ganc</i>    | ENSMUSG00000062646 |
| <i>Gclc</i>    | ENSMUSG00000032350 |
| <i>Gclm</i>    | ENSMUSG00000028124 |
| <i>Ggt1</i>    | ENSMUSG00000006345 |
| <i>Gpx1</i>    | ENSMUSG00000063856 |
| <i>Gpx2</i>    | ENSMUSG00000042808 |
| <i>Gpx3</i>    | ENSMUSG00000018339 |
| <i>Gpx4</i>    | ENSMUSG00000075706 |
| <i>Gpx5</i>    | ENSMUSG00000004344 |
| <i>Gpx6</i>    | ENSMUSG00000004341 |
| <i>Gpx7</i>    | ENSMUSG00000028597 |
| <i>Gsr</i>     | ENSMUSG00000031584 |
| <i>Gss</i>     | ENSMUSG00000027610 |
| <i>Gsta1</i>   | ENSMUSG00000074183 |
| <i>Gsta3</i>   | ENSMUSG00000025934 |
| <i>Gsta4</i>   | ENSMUSG00000032348 |
| <i>Alkbh8</i>  | ENSMUSG00000025899 |
| <i>Gstk1</i>   | ENSMUSG00000029864 |
| <i>Gstm2</i>   | ENSMUSG00000040562 |
| <i>Gstm3</i>   | ENSMUSG00000004038 |
| <i>Gstm4</i>   | ENSMUSG00000027890 |
| <i>Gstm5</i>   | ENSMUSG00000004032 |
| <i>Gstm7</i>   | ENSMUSG00000004035 |
| <i>Gsto1</i>   | ENSMUSG00000025068 |
| <i>Gsto2</i>   | ENSMUSG00000025069 |
| <i>Gstp1</i>   | ENSMUSG00000060803 |
| <i>Gstt1</i>   | ENSMUSG00000001663 |
| <i>H2afx</i>   | ENSMUSG00000049932 |
| <i>Hif1a</i>   | ENSMUSG00000021109 |
| <i>Hmox1</i>   | ENSMUSG00000005413 |
| <i>Hnmt</i>    | ENSMUSG00000026986 |
| <i>Hspa1a</i>  | ENSMUSG00000091971 |
| <i>Hspa1l</i>  | ENSMUSG00000007033 |
| <i>Hspa2</i>   | ENSMUSG00000059970 |
| <i>Hspa4</i>   | ENSMUSG00000020361 |
| <i>Hspa4l</i>  | ENSMUSG00000025757 |
| <i>Hspa5</i>   | ENSMUSG00000026864 |
| <i>Hspb9</i>   | ENSMUSG00000017832 |

|               |                    |
|---------------|--------------------|
| <i>Hsph1</i>  | ENSMUSG00000029657 |
| <i>Htra2</i>  | ENSMUSG00000068329 |
| <i>Htra4</i>  | ENSMUSG00000037406 |
| <i>Hus1</i>   | ENSMUSG00000020413 |
| <i>Idh1</i>   | ENSMUSG00000025950 |
| <i>Ifng</i>   | ENSMUSG00000055170 |
| <i>Ift172</i> | ENSMUSG00000038564 |
| <i>Il10ra</i> | ENSMUSG00000032089 |
| <i>Il10rb</i> | ENSMUSG00000022969 |
| <i>Il11</i>   | ENSMUSG00000004371 |
| <i>Il13</i>   | ENSMUSG00000020383 |
| <i>Il15</i>   | ENSMUSG00000031712 |
| <i>Il16</i>   | ENSMUSG00000001741 |
| <i>Il17a</i>  | ENSMUSG00000025929 |
| <i>Il17b</i>  | ENSMUSG00000024578 |
| <i>Il17f</i>  | ENSMUSG00000041872 |
| <i>Il19</i>   | ENSMUSG00000016524 |
| <i>Il1a</i>   | ENSMUSG00000027399 |
| <i>Il1b</i>   | ENSMUSG00000027398 |
| <i>Il1r1</i>  | ENSMUSG00000026072 |
| <i>Il1rn</i>  | ENSMUSG00000026981 |
| <i>Il21</i>   | ENSMUSG00000027718 |
| <i>Il22</i>   | ENSMUSG00000074695 |
| <i>Il27</i>   | ENSMUSG00000044701 |
| <i>Il2rb</i>  | ENSMUSG00000068227 |
| <i>Il2rg</i>  | ENSMUSG00000031304 |
| <i>Il3</i>    | ENSMUSG00000018914 |
| <i>Il33</i>   | ENSMUSG00000024810 |
| <i>Il4</i>    | ENSMUSG00000000869 |
| <i>Il5</i>    | ENSMUSG00000036117 |
| <i>Il5ra</i>  | ENSMUSG00000005364 |
| <i>Il6</i>    | ENSMUSG00000025746 |
| <i>Il6ra</i>  | ENSMUSG00000027947 |
| <i>Il6st</i>  | ENSMUSG00000021756 |
| <i>Il7</i>    | ENSMUSG00000040329 |
| <i>Inmt</i>   | ENSMUSG00000003477 |
| <i>Insig1</i> | ENSMUSG00000045294 |
| <i>Insig2</i> | ENSMUSG00000003721 |
| <i>Krt1</i>   | ENSMUSG00000046834 |
| <i>Lig1</i>   | ENSMUSG00000056394 |
| <i>Lin9</i>   | ENSMUSG00000058729 |

|                 |                    |
|-----------------|--------------------|
| <i>Lpo</i>      | ENSMUSG00000009356 |
| <i>Lta</i>      | ENSMUSG00000024402 |
| <i>Ltb</i>      | ENSMUSG00000024399 |
| <i>Manf</i>     | ENSMUSG00000032575 |
| <i>Mapk10</i>   | ENSMUSG00000046709 |
| <i>Mapk8</i>    | ENSMUSG00000021936 |
| <i>AW490526</i> | ENSMUSG00000020366 |
| <i>Mb</i>       | ENSMUSG00000018893 |
| <i>Mbd4</i>     | ENSMUSG00000030322 |
| <i>Mbtps1</i>   | ENSMUSG00000031835 |
| <i>Mbtps2</i>   | ENSMUSG00000046873 |
| <i>Mcph1</i>    | ENSMUSG00000039842 |
| <i>Mdc1</i>     | ENSMUSG00000061607 |
| <i>Mgmt</i>     | ENSMUSG00000054612 |
| <i>Mgst1</i>    | ENSMUSG00000008540 |
| <i>Mgst2</i>    | ENSMUSG00000074604 |
| <i>Mgst3</i>    | ENSMUSG00000026688 |
| <i>Mif</i>      | ENSMUSG00000033307 |
| <i>Mlh1</i>     | ENSMUSG00000032498 |
| <i>Mlh3</i>     | ENSMUSG00000021245 |
| <i>Mmp13</i>    | ENSMUSG00000050578 |
| <i>Mmp2</i>     | ENSMUSG00000031740 |
| <i>Mmp7</i>     | ENSMUSG00000018623 |
| <i>Mmp9</i>     | ENSMUSG00000017737 |
| <i>Mpg</i>      | ENSMUSG00000020287 |
| <i>Mpo</i>      | ENSMUSG00000009350 |
| <i>Mre11a</i>   | ENSMUSG00000031928 |
| <i>Msh2</i>     | ENSMUSG00000024151 |
| <i>Msh3</i>     | ENSMUSG00000014850 |
| <i>Nampt</i>    | ENSMUSG00000020572 |
| <i>Nbn</i>      | ENSMUSG00000028224 |
| <i>Ncf1</i>     | ENSMUSG00000015950 |
| <i>Ncf2</i>     | ENSMUSG00000026480 |
| <i>Nfe2l2</i>   | ENSMUSG00000015839 |
| <i>Nrf1</i>     | ENSMUSG00000058440 |
| <i>Ngb</i>      | ENSMUSG00000021032 |
| <i>Nos2</i>     | ENSMUSG00000020826 |
| <i>Nox1</i>     | ENSMUSG00000031257 |
| <i>Nox4</i>     | ENSMUSG00000030562 |
| <i>Noxa1</i>    | ENSMUSG00000036805 |
| <i>Noxo1</i>    | ENSMUSG00000019320 |

|                 |                    |
|-----------------|--------------------|
| <i>Nploc4</i>   | ENSMUSG00000039703 |
| <i>Nqo1</i>     | ENSMUSG00000003849 |
| <i>Nthl1</i>    | ENSMUSG00000041429 |
| <i>Nucb1</i>    | ENSMUSG00000030824 |
| <i>Ogg1</i>     | ENSMUSG00000030271 |
| <i>Os9</i>      | ENSMUSG00000040462 |
| <i>Osm</i>      | ENSMUSG00000058755 |
| <i>Park7</i>    | ENSMUSG00000028964 |
| <i>Parp1</i>    | ENSMUSG00000026496 |
| <i>Parp2</i>    | ENSMUSG00000036023 |
| <i>Pcna</i>     | ENSMUSG00000027342 |
| <i>Pdia3</i>    | ENSMUSG00000027248 |
| <i>Perp</i>     | ENSMUSG00000019851 |
| <i>Pf4</i>      | ENSMUSG00000029373 |
| <i>Pfdn2</i>    | ENSMUSG00000006412 |
| <i>Pfdn5</i>    | ENSMUSG00000001289 |
| <i>Pms2</i>     | ENSMUSG00000079109 |
| <i>Pole</i>     | ENSMUSG00000007080 |
| <i>Polh</i>     | ENSMUSG00000023953 |
| <i>Poli</i>     | ENSMUSG00000038425 |
| <i>POR</i>      | ENSMUSG00000005514 |
| <i>Ppia</i>     | ENSMUSG00000071866 |
| <i>Ppm1d</i>    | ENSMUSG00000020525 |
| <i>Ppp1r15a</i> | ENSMUSG00000040435 |
| <i>Ppp1r15b</i> | ENSMUSG00000046062 |
| <i>Prdx1</i>    | ENSMUSG00000028691 |
| <i>Prdx2</i>    | ENSMUSG00000005161 |
| <i>Prdx3</i>    | ENSMUSG00000024997 |
| <i>Prdx4</i>    | ENSMUSG00000025289 |
| <i>Prdx5</i>    | ENSMUSG00000024953 |
| <i>Prdx6</i>    | ENSMUSG00000026701 |
| <i>Prkcsh</i>   | ENSMUSG00000003402 |
| <i>Prnp</i>     | ENSMUSG00000079037 |
| <i>Psmb5</i>    | ENSMUSG00000022193 |
| <i>Ptges</i>    | ENSMUSG00000050737 |
| <i>Ptgs1</i>    | ENSMUSG00000047250 |
| <i>Ptgs2</i>    | ENSMUSG00000032487 |
| <i>Pttg1</i>    | ENSMUSG00000020415 |
| <i>Rad1</i>     | ENSMUSG00000022248 |
| <i>Rad17</i>    | ENSMUSG00000021635 |
| <i>Rad18</i>    | ENSMUSG00000030254 |

|                  |                    |
|------------------|--------------------|
| <i>Rad21</i>     | ENSMUSG00000022314 |
| <i>Rad50</i>     | ENSMUSG00000020380 |
| <i>Rad51</i>     | ENSMUSG00000027323 |
| <i>Rad52</i>     | ENSMUSG00000030166 |
| <i>Rad9a</i>     | ENSMUSG00000024824 |
| <i>Rag2</i>      | ENSMUSG00000032864 |
| <i>Recql4</i>    | ENSMUSG00000033762 |
| <i>Rev1</i>      | ENSMUSG00000026082 |
| <i>Rpa1</i>      | ENSMUSG00000000751 |
| <i>Rpn1</i>      | ENSMUSG00000030062 |
| <i>Scap</i>      | ENSMUSG00000032485 |
| <i>Scd1</i>      | ENSMUSG00000037071 |
| <i>Sec63</i>     | ENSMUSG00000019802 |
| <i>Selm</i>      | ENSMUSG00000075702 |
| <i>Selp</i>      | ENSMUSG00000026580 |
| <i>SepN1</i>     | ENSMUSG00000050989 |
| <i>Sephs2</i>    | ENSMUSG00000049091 |
| <i>Serp1</i>     | ENSMUSG00000027808 |
| <i>Serpinb1b</i> | ENSMUSG00000051029 |
| <i>Sil1</i>      | ENSMUSG00000024357 |
| <i>Slc38a1</i>   | ENSMUSG00000023169 |
| <i>Smc1a</i>     | ENSMUSG00000041133 |
| <i>Smc3</i>      | ENSMUSG00000024974 |
| <i>Sod1</i>      | ENSMUSG00000022982 |
| <i>Sod2</i>      | ENSMUSG00000006818 |
| <i>Sod3</i>      | ENSMUSG00000072941 |
| <i>Spp1</i>      | ENSMUSG00000029304 |
| <i>Sqstm1</i>    | ENSMUSG00000015837 |
| <i>Srebf1</i>    | ENSMUSG00000020538 |
| <i>Srebf2</i>    | ENSMUSG00000022463 |
| <i>Srxn1</i>     | ENSMUSG00000032802 |
| <i>Sumo1</i>     | ENSMUSG00000026021 |
| <i>Syvn1</i>     | ENSMUSG00000024807 |
| <i>Tcp1</i>      | ENSMUSG00000068039 |
| <i>Tnf</i>       | ENSMUSG00000024401 |
| <i>AI315324</i>  | ENSMUSG00000063727 |
| <i>Tnfsf10</i>   | ENSMUSG00000039304 |
| <i>Tnfsf11</i>   | ENSMUSG00000022015 |
| <i>Tnfsf13</i>   | ENSMUSG00000089669 |
| <i>Tnfsf13b</i>  | ENSMUSG00000031497 |
| <i>Tnfsf4</i>    | ENSMUSG00000026700 |

|                 |                    |
|-----------------|--------------------|
| <i>Topbp1</i>   | ENSMUSG00000032555 |
| <i>Tor1a</i>    | ENSMUSG00000026849 |
| <i>Tpo</i>      | ENSMUSG00000020673 |
| <i>Trp53</i>    | ENSMUSG00000059552 |
| <i>Trp53bp1</i> | ENSMUSG00000043909 |
| <i>Txn1</i>     | ENSMUSG00000028367 |
| <i>Txnip</i>    | ENSMUSG00000038393 |
| <i>Txnrd1</i>   | ENSMUSG00000020250 |
| <i>Txnrd2</i>   | ENSMUSG00000075704 |
| <i>Txnrd3</i>   | ENSMUSG00000000811 |
| <i>Ucp2</i>     | ENSMUSG00000033685 |
| <i>Ucp3</i>     | ENSMUSG00000032942 |
| <i>Uggt1</i>    | ENSMUSG00000037470 |
| <i>Uggt2</i>    | ENSMUSG00000042104 |
| <i>Ung</i>      | ENSMUSG00000029591 |
| <i>Vegfa</i>    | ENSMUSG00000023951 |
| <i>Vim</i>      | ENSMUSG00000026728 |
| <i>Vimp</i>     | ENSMUSG00000075701 |
| <i>Wrn</i>      | ENSMUSG00000031583 |
| <i>Xbp1</i>     | ENSMUSG00000020484 |
| <i>Xpa</i>      | ENSMUSG00000028329 |
| <i>Xpc</i>      | ENSMUSG00000030094 |

## Supplemental Tables and Figure Legends

### Supplemental Table 1. Complete gene panel for targeted RNA sequencing

Gene names are shown on the left and Ensembl ID on the right.

### Supplemental Figure 1. Expression of 350 stress response transcripts obtained via targeted RNA sequencing.

Heat map showing differences in quantitated gene expression of 350 stress response genes. **A)** Basal *Alkbh8<sup>def</sup>* lung transcripts relative to WT **B)** Corn Oil and 24 hour, 200mg/kg NA-treated WT and *Alkbh8<sup>def</sup>* lungs. N = 2 mice per condition.

### Supplemental Figure 2. Amnis Imagestream experimental data showing DCFDA results and $\gamma$ H2AX examples.

Intracellular ROS was measured in mouse lungs by DCFDA staining. Untreated 8-12 week old WT and *Alkbh8<sup>def</sup>* mice were sacrificed, lungs removed and enzymatically and mechanically dissociated into a single-cell suspension as described in methods. The live cells were then incubated with DCFDA dye and imaged with an Amnis Imagestream ISX100 flow cytometer. **A)** Representative images showing range of DCFDA fluorescence in the mixed population of lung cells. **B)** The frequency of WT (blue) and *Alkbh8<sup>def</sup>* (red) cells exhibiting specific DCFDA intensities is plotted for a population of 12,160 and 11,726, respectively. An arbitrary cutoff of  $1 \times 10^5$  RFU was used to separate low and high DCFDA intensity. 30.6% of WT cells fall into the high DCFDA category,



compared to 30.9% of *Alkbh8*<sup>def</sup> ( $P = 0.946$ ).  $\gamma$ H2AX staining was performed using the Amnis Imagestream ISX100 flow cytometer. **C)** shows representative images of a low spot count  $\leq 1$  and **D)** high spot count  $\geq 2$ .

**Supplemental Figure 3. *Alkbh8*<sup>def</sup> mice have less GSH and more GSSG under basal conditions, and more GSSG under NA-challenged conditions.**

LC-MS/MS was employed to measure GSH and GSSG in WT and *Alkbh8*<sup>def</sup> mice. **A)** GSH in untreated lungs **B)** GSSG in untreated lungs **C)** Total GSH + GSSG in untreated lungs **D)** GSH in CO and NA-challenged lungs and **E)** GSSG in CO and NA-challenged lungs **F)** Total GSH + GSSG in NA-challenged lungs. (N = 3 mice per condition, \* $P \leq 0.05$ ).

**Supplemental Figure 4. *Alkbh8*<sup>def</sup> mice have less *Alkbh8* transcript after CO and NA challenge.**

Quantitative RT-PCR (qRT-PCR) was used to measure *Alkbh8* transcript in 24h CO and 24h, 200 mg/kg NA-treated mouse lungs as described in the methods. (N = 3 lungs per condition, \*\* $P \leq 0.01$ , \*\*\* $P \leq 0.001$ ).

**Supplemental Figure 5. Wes blots for selenoproteins GPX1, GPX3, SELS, TRXR1 and TRXR2 and non-selenoprotein TRX2.**

Wes capillaries showing full protein expression results for **A)** GPX1 **B)** GPX3, **C)** SELS **D)** TRXR1, **E)** TRXR2, and **F)** TRX2. Loading control (GAPDH) was multiplexed in each

capillary and is shown on the bottom in each data set. Each capillary blot represents one mouse.

**Supplemental Figure 6. *Alkbh8*<sup>def</sup> mice show increased lung injury after 3-day NA exposure.**

Two examples from lungs of WT (top row), *Alkbh8*<sup>def</sup> (middle row) and *Cyp2abfgs-null* (bottom row) mouse lungs after 3-day NA exposure, 200 mg/kg.
